# Supplementary material for: SECAPR—a bioinformatics pipeline for the rapid and user-friendly processing of targeted enriched Illumina sequences, from raw reads to alignments
Source: PubMed Central journal article supplement (PMC6047508; doi:10.7717/peerj.5175), 2018-07-13
Supplement: peerj-06-5175-s002.pdf [file peerj-06-5175-s002.pdf]

### Phylogenetic Inference under the Multispecies Coalescent (MSC) model

Using the SECAPR *locus\_selection* function we selected the 50 exon loci with the highest read coverage across all samples after reference-based assembly. We then applied the SECAPR *phase\_alleles* function in order to generate two allele sequences for each sample and locus. The resulting phased allele sequences of all samples were aligned for each locus, resulting into 50 allele Multiple Sequence Alignments (MSAs). These 50 MSAs were analyzed using the STACEY (Graham Jones 2017; G. Jones et al. 2015) plugin in BEAST2 (v.2.4.4) (Bouckaert et al. 2014). Using the BEAUTI GUI (v.2.4.4), we unlinked the site models, clock models and gene trees of all loci. We chose a JC substitution model for all loci, a fixed strict clock rate of 1 for one random locus and estimated all other clock rates relative to this locus (strict clock). We chose the STACEY-specific BirthDeathCollapse species tree model with a collapse height of  $1e-5$ . This tree-model allows taxon-assignment free analyses under the MSC model, which allows to observe every sequence as an individual tip in the species tree (rather than having to assign sequences to expected clusters (= species) prior to analysis. Further priors were:  $\text{bdcGrowthRate} = \log \text{normal}(M=4.6, S=1.5)$ ;  $\text{collapseWeight} = \text{beta}(\alpha=2, \beta=2)$ ;  $\text{popPriorScale} = \log \text{normal}(M=-7, S=2)$ ;  $\text{relativeDeathRate} = \text{beta}(\alpha=1.0, \beta=1.0)$ .

We set the MCMC for 1 billion generations, logging every 100,000 generations. After approximately 500 million generations all parameters had reached convergence (assessed with Tracer v.1.6, Rambaut et al. 2013) and the MCMC was stopped (approximately 80 hours on a Mac Pro, Late 2013, 3.5 GHz 6-Core Intel Xeon E5 processor). The resulting distribution of species trees was summarized with TreeAnnotator (v2.4.4), using mean heights and excluding 10% burn-in. We then used the SpeciesDelimitationAnalyser (part of the STACEY distribution) to calculate the posterior probability for each pair of species of belonging to the same cluster. This probability was calculated from the complete posterior tree distribution (excl. 10% burn-in), using a user-defined collapse-height value of  $1e-5$ .

1061\_0  
1061\_1  
1068\_0  
1068\_1  
1073\_0  
1073\_1  
1079\_0  
1079\_1  
1074\_0  
1074\_1  
1063\_0  
1063\_1  
1064\_0  
1064\_1  
1086\_0  
1086\_1  
1065\_0  
1065\_1  
1070\_0  
1070\_1  
1085\_0  
1085\_1  
1083\_0  
1083\_1  
1080\_0  
1080\_1  
1140\_0  
1140\_1  
1166\_0  
1166\_1  
1082\_0  
1082\_1  
1087\_0  
1087\_1

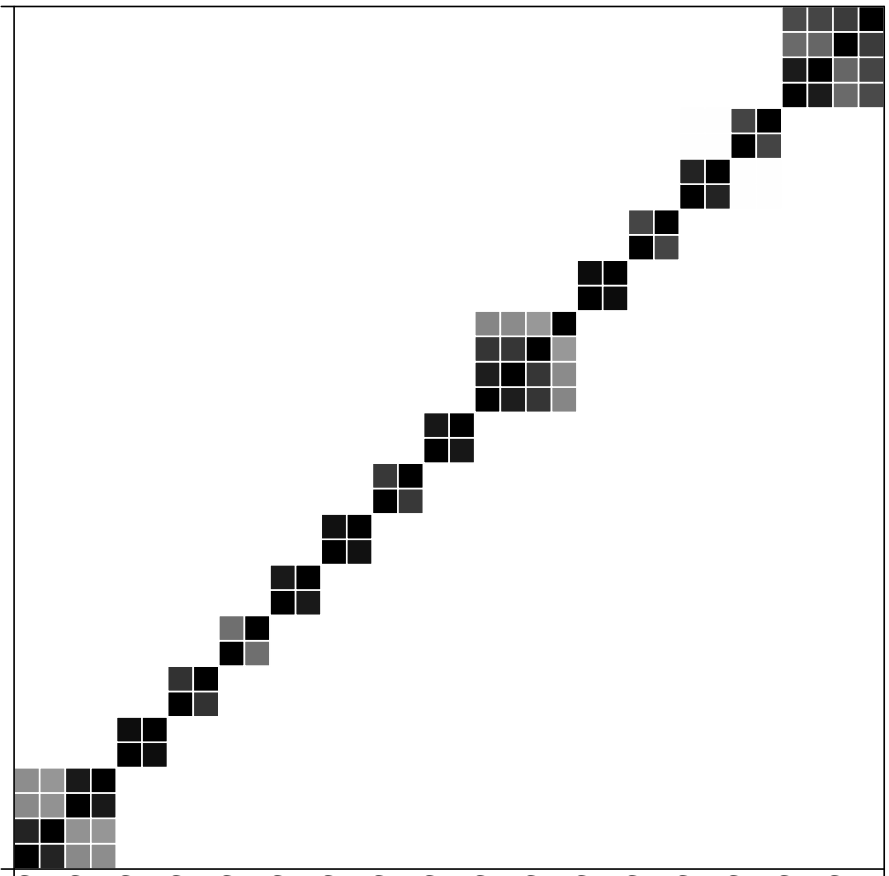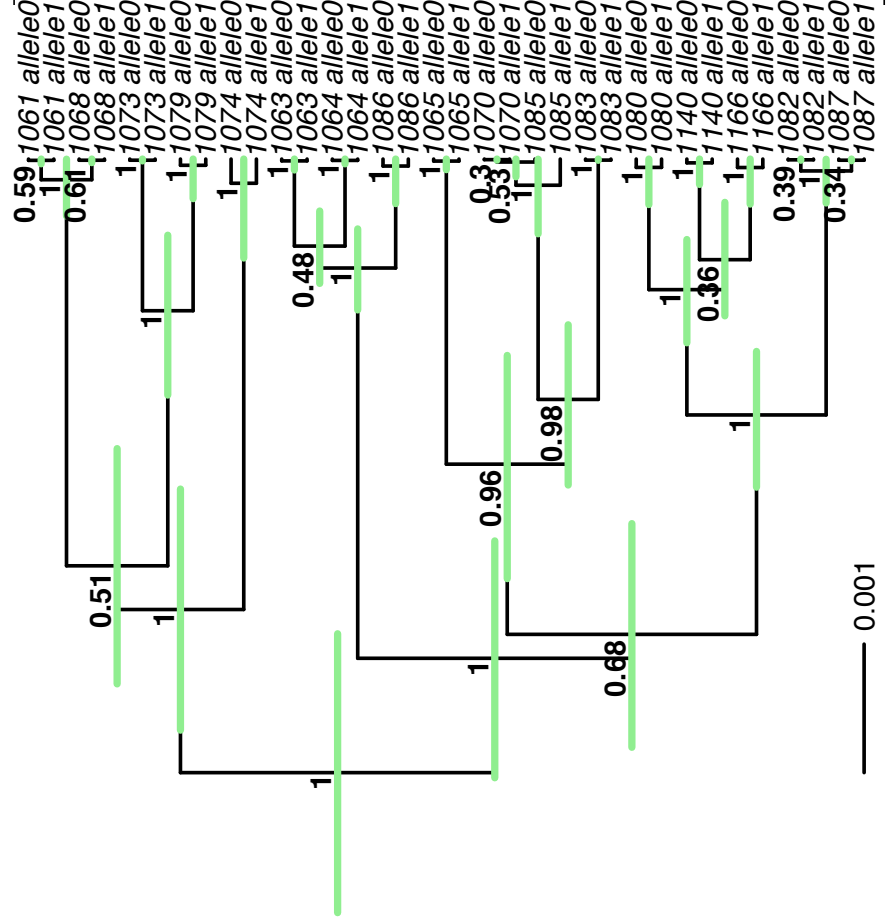

## References

- Bouckaert, Remco, Joseph Heled, Denise Kühnert, Tim Vaughan, Chieh-Hsi Wu, Dong Xie, Marc A. Suchard, et al. 2014. "BEAST 2: A Software Platform for Bayesian Evolutionary Analysis." Edited by Andreas Prlic. *PLoS Computational Biology* 10 (4). Public Library of Science: e1003537. doi:10.1371/journal.pcbi.1003537.
- Jones, G., Z. Aydin, B. Oxelman, Aydin Z., Baele G., Belfiore N.M., de Queiroz K., et al. 2015. "DISSECT: An Assignment-Free Bayesian Discovery Method for Species Delimitation under the Multispecies Coalescent." *Bioinformatics* 31 (7). Oxford University Press: 991–98. doi:10.1093/bioinformatics/btu770.
- Jones, Graham. 2017. "Algorithmic Improvements to Species Delimitation and Phylogeny Estimation under the Multispecies Coalescent." *Journal of Mathematical Biology* 74 (1–2): 447–67. doi:10.1007/s00285-016-1034-0.
- Rambaut, A, Marc A. Suchard, Walter Xie, and AJ Drummond. 2013. "Tracer v1.6."
