# Supplementary material for: SECAPR—a bioinformatics pipeline for the rapid and user-friendly processing of targeted enriched Illumina sequences, from raw reads to alignments
Source: PeerJ. 2018 Jul 13;6:e5175. doi: 10.7717/peerj.5175 (PMC6047508; doi:10.7717/peerj.5175)
Supplement: Table S2 — The table shows which exon locus had a matching contig in each of the Geonoma samples. [file peerj-06-5175-s004.xlsx]

## Sheet: Sheet1
exon	1082	1061	1086	1140	1065	1087	1074	1064	1083	1070	1166	1073	1080	1063	1085	1079	1068	exon present in n samples
Elaeis_1007_0	1	1	1	1	1	1	1	1	1	1	1	1	1	1	1	1	1	17
Elaeis_1007_1	1	1	1	1	1	1	1	1	1	1	1	1	1	1	1	1	1	17
Elaeis_1007_2	1	1	1	1	1	1	1	1	1	1	1	1	1	1	1	1	1	17
Elaeis_1007_3	1	1	1	1	1	1	1	1	1	1	1	1	1	1	1	1	1	17
Elaeis_1007_4	1	1	1	1	1	1	1	0	1	1	1	1	1	1	1	1	1	16
Elaeis_1007_5	1	1	1	1	0	1	0	1	1	1	1	1	1	0	0	1	1	13
Elaeis_1007_6	1	1	1	1	1	1	0	1	0	0	1	1	1	1	1	1	1	14
Elaeis_1007_7	1	1	1	1	1	1	1	1	1	1	0	1	1	1	1	1	1	16
Elaeis_1013_5	0	1	0	0	0	0	1	1	0	0	0	0	0	0	1	1	1	6
Elaeis_1013_6	1	1	1	0	1	0	1	1	1	1	1	1	1	0	1	1	1	14
Elaeis_1017_0	1	0	1	1	1	1	1	1	0	1	0	0	1	1	1	1	1	13
Elaeis_1017_1	1	0	1	0	1	1	1	1	1	1	1	1	1	1	1	1	1	15
Elaeis_1017_2	1	1	0	1	1	1	1	1	1	1	1	1	1	1	0	0	1	14
Elaeis_1017_3	1	1	1	1	1	1	1	1	1	1	1	1	1	1	1	1	1	17
Elaeis_1017_4	1	1	1	0	1	1	1	1	1	1	1	1	1	1	1	1	1	16
Elaeis_1017_5	1	1	0	1	1	1	1	0	1	1	1	1	0	1	1	1	1	14
Elaeis_1017_6	1	1	0	1	1	1	1	1	1	1	1	1	1	0	1	1	1	15
Elaeis_1020_1	0	0	1	0	1	1	1	0	1	1	1	1	1	1	1	0	1	12
Elaeis_1020_3	1	1	1	0	0	1	0	1	1	1	1	1	0	1	1	0	1	12
Elaeis_1020_4	1	1	1	1	1	1	1	1	1	1	1	1	1	1	1	1	1	17
Elaeis_1020_5	1	1	1	1	1	1	1	1	1	1	1	1	1	1	0	1	1	16
Elaeis_1020_6	1	1	1	1	1	1	1	1	1	1	1	1	1	1	0	1	1	16
Elaeis_1020_7	1	1	1	0	1	1	1	0	1	1	1	1	1	0	1	1	1	14
Elaeis_1025_0	0	1	0	0	0	1	1	0	0	0	0	1	0	1	1	1	1	8
Elaeis_1025_1	1	0	0	1	0	1	1	1	0	0	0	0	0	1	1	0	1	8
Elaeis_1025_2	0	0	0	0	0	0	1	0	0	0	0	1	0	0	0	0	1	3
Elaeis_1025_8	1	1	1	1	1	1	1	1	1	1	1	1	1	1	1	1	1	17
Elaeis_1025_9	1	1	1	0	1	1	1	1	1	1	1	1	1	1	1	1	1	16
Elaeis_1035_0	0	0	0	0	0	0	0	0	0	0	0	0	0	0	0	0	0	0
Elaeis_1035_1	1	1	1	1	1	1	1	1	1	1	1	1	1	1	1	1	1	17
Elaeis_1035_2	1	1	1	1	1	1	1	1	0	1	1	1	1	1	1	1	1	16
Elaeis_1035_7	1	1	1	1	1	1	1	1	1	1	1	1	1	1	1	1	1	17
Elaeis_1050_0	1	1	1	0	1	0	0	1	0	1	1	1	1	1	0	1	1	12
Elaeis_1050_1	1	1	0	1	1	0	0	0	0	1	1	1	1	1	1	1	1	12
Elaeis_1050_12	1	1	1	1	1	0	0	1	0	1	0	1	0	1	1	1	0	11
Elaeis_1050_6	1	1	1	1	1	1	0	1	1	1	1	1	1	1	1	1	1	16
Elaeis_1050_7	1	0	1	1	1	1	0	1	0	1	0	1	1	0	1	1	1	12
Elaeis_1052_0	0	0	0	0	0	0	1	0	1	0	0	1	0	0	1	1	0	5
Elaeis_1052_1	1	1	1	0	1	1	1	1	1	1	1	1	1	1	1	1	1	16
Elaeis_1052_2	1	0	1	1	1	1	1	1	1	1	1	1	1	1	0	1	1	15
Elaeis_1052_3	1	1	1	1	1	1	1	1	0	1	1	0	0	1	0	1	1	13
Elaeis_1064_0	1	1	1	1	0	1	1	1	0	0	0	1	1	0	0	0	1	10
Elaeis_1064_1	1	1	1	1	1	1	1	1	0	0	1	1	1	1	0	0	1	13
Elaeis_1064_2	1	1	1	0	0	1	1	1	0	1	1	0	1	1	0	0	1	11
Elaeis_1064_3	1	1	1	1	0	1	1	1	0	0	1	1	1	1	0	1	1	13
Elaeis_1119_0	0	0	0	0	0	0	0	0	0	1	0	0	1	1	0	1	0	4
Elaeis_1119_1	0	0	0	0	1	0	1	0	1	0	0	0	0	0	0	0	0	3
Elaeis_1119_2	0	0	0	0	0	0	0	1	0	1	0	0	0	0	0	0	0	2
Elaeis_1119_3	0	0	0	1	0	0	0	1	0	0	0	0	0	0	0	0	0	2
Elaeis_111_2	0	0	0	0	0	0	0	0	0	0	0	0	0	0	0	0	0	0
Elaeis_111_3	0	0	0	0	0	0	0	0	0	1	0	0	0	0	0	0	1	2
Elaeis_1168_2	0	0	0	0	0	0	0	0	1	0	0	0	0	1	0	0	0	2
Elaeis_1168_4	1	1	0	0	1	0	1	0	0	0	0	1	0	1	0	0	1	7
Elaeis_1168_5	1	1	0	0	1	0	1	0	0	0	0	1	0	0	0	0	1	6
Elaeis_1171_0	0	0	1	0	0	0	0	0	1	0	1	0	0	0	0	0	0	3
Elaeis_1171_1	1	1	0	0	0	0	1	0	1	0	0	1	0	1	1	1	0	8
Elaeis_1171_2	0	1	0	0	0	0	0	0	0	0	0	0	0	0	0	0	0	1
Elaeis_1171_3	0	0	1	0	1	0	0	0	0	0	0	1	0	0	0	1	0	4
Elaeis_1171_4	0	0	0	0	0	0	0	0	0	0	0	0	0	0	0	0	0	0
Elaeis_1171_5	0	0	0	0	0	0	0	0	0	0	0	0	0	0	0	0	0	0
Elaeis_1171_6	0	0	0	0	0	0	0	0	0	0	0	0	0	0	0	0	0	0
Elaeis_1197_0	1	1	0	1	1	1	1	1	0	1	1	0	1	1	1	1	0	13
Elaeis_1197_10	1	1	1	0	1	0	1	1	1	1	1	1	1	1	1	1	1	15
Elaeis_1197_3	1	1	1	1	1	1	1	1	1	1	1	1	1	1	0	1	1	16
Elaeis_1197_5	1	1	1	0	1	1	1	1	1	1	1	1	1	0	1	1	1	15
Elaeis_1197_6	1	1	1	1	1	1	1	1	1	1	1	1	1	1	1	1	1	17
Elaeis_1197_7	1	1	1	1	1	1	1	1	1	1	1	1	0	1	1	1	1	16
Elaeis_1197_8	1	1	1	1	1	1	1	1	1	1	1	1	1	1	1	1	1	17
Elaeis_1201_0	0	0	1	0	1	1	1	1	1	1	0	1	1	1	0	0	1	11
Elaeis_1201_1	1	1	1	1	1	1	1	1	1	1	1	1	1	1	1	1	1	17
Elaeis_1201_2	1	1	1	1	1	1	1	1	1	1	1	1	1	1	1	1	1	17
Elaeis_1201_3	1	1	1	1	1	1	1	1	1	1	1	1	1	1	1	1	1	17
Elaeis_1201_4	0	0	0	0	0	0	0	0	0	0	0	0	0	0	0	0	0	0
Elaeis_1201_5	1	1	1	1	1	1	1	1	0	1	1	1	1	0	1	1	1	15
Elaeis_1201_6	1	0	0	1	0	1	1	1	1	1	0	0	1	1	0	1	1	11
Elaeis_1201_7	0	0	1	0	1	1	0	1	1	1	1	1	1	1	1	1	1	13
Elaeis_122_1	0	0	0	0	0	0	0	1	0	1	0	0	0	1	0	0	0	3
Elaeis_122_10	0	0	0	0	0	0	0	0	0	0	0	0	0	0	0	0	0	0
Elaeis_122_11	1	0	1	0	1	1	1	0	1	1	1	1	0	0	1	1	1	12
Elaeis_122_4	1	1	1	0	1	1	1	1	1	1	1	1	1	1	1	1	1	16
Elaeis_122_5	0	0	1	0	0	0	0	0	0	0	1	0	1	0	0	0	0	3
Elaeis_122_7	1	1	1	1	1	1	1	1	1	1	1	1	1	1	1	1	1	17
Elaeis_122_9	1	1	1	1	1	1	1	1	1	1	1	1	1	1	1	1	1	17
Elaeis_12_0	1	1	1	0	0	1	1	1	1	1	1	1	1	1	1	1	1	15
Elaeis_12_2	1	1	1	1	1	1	1	1	1	1	1	1	0	1	1	1	1	16
Elaeis_12_3	1	1	1	1	1	1	1	1	1	1	0	1	0	1	1	1	1	15
Elaeis_12_4	1	1	0	0	0	0	1	1	0	1	0	1	0	0	0	0	1	7
Elaeis_12_5	1	1	1	1	1	1	1	1	1	1	1	1	1	1	1	1	1	17
Elaeis_12_6	1	1	1	1	1	1	1	0	1	1	1	1	1	1	1	1	1	16
Elaeis_12_7	1	1	1	1	1	1	1	1	1	1	1	1	0	1	0	1	1	15
Elaeis_12_9	1	1	0	0	1	1	1	1	1	1	1	1	1	0	1	1	1	14
Elaeis_136_0	0	0	0	1	0	0	0	0	0	0	0	0	0	0	0	0	0	1
Elaeis_136_10	1	1	1	1	1	1	1	1	0	1	1	0	1	1	1	1	1	15
Elaeis_136_12	1	1	0	1	1	1	1	1	1	1	1	1	1	1	1	1	1	16
Elaeis_136_14	0	0	0	0	0	0	0	0	0	0	0	1	0	0	0	0	0	1
Elaeis_136_16	0	1	0	0	1	1	1	1	1	0	0	0	1	1	1	1	1	11
Elaeis_136_17	1	1	1	1	1	1	1	1	1	1	1	1	1	1	1	1	1	17
Elaeis_136_18	1	0	1	1	1	1	0	1	1	1	0	0	1	1	1	0	1	12
Elaeis_136_2	1	0	1	1	1	1	1	1	1	1	1	0	1	1	1	0	0	13
Elaeis_136_20	1	0	0	0	0	0	1	0	0	0	0	0	0	0	0	0	0	2
Elaeis_136_24	1	1	1	1	1	0	0	1	0	0	1	0	1	1	0	0	1	10
Elaeis_136_3	0	0	0	0	0	0	0	0	0	0	0	0	0	0	0	0	0	0
Elaeis_136_5	1	0	1	0	1	1	0	1	1	1	1	0	1	1	1	1	1	13
Elaeis_136_6	0	0	0	0	0	0	0	0	0	0	0	0	0	0	0	0	0	0
Elaeis_136_7	1	1	1	1	1	1	0	1	0	0	1	0	1	1	1	0	1	12
Elaeis_136_8	0	0	0	0	0	0	0	0	0	0	0	0	0	0	0	0	0	0
Elaeis_136_9	1	0	1	1	1	1	1	1	0	1	1	0	1	1	1	1	1	14
Elaeis_139_0	1	1	0	1	1	0	1	1	1	1	1	0	0	1	1	1	1	13
Elaeis_139_1	0	0	0	0	0	0	0	0	0	0	0	0	0	0	0	0	0	0
Elaeis_139_2	1	1	1	1	1	1	1	1	1	1	1	0	1	1	1	1	1	16
Elaeis_139_3	0	0	0	1	1	0	0	0	0	0	0	0	0	0	0	1	0	3
Elaeis_1484_0	0	0	0	0	0	0	0	0	0	0	0	0	0	0	0	0	0	0
Elaeis_1484_2	1	1	0	1	1	1	1	0	1	0	1	1	1	1	0	1	1	13
Elaeis_1484_3	1	1	1	1	1	1	1	1	1	1	1	0	1	1	1	1	1	16
Elaeis_1494_1	1	1	1	1	1	1	1	1	1	1	1	1	0	1	1	1	1	16
Elaeis_1494_2	0	0	0	0	0	0	0	0	0	0	0	0	0	0	0	0	0	0
Elaeis_1494_6	1	1	1	1	1	1	1	1	1	1	1	1	1	1	1	1	1	17
Elaeis_1494_7	1	1	1	1	1	1	1	1	1	1	1	1	1	1	1	1	1	17
Elaeis_14_0	0	0	0	0	0	0	0	0	0	0	0	0	0	0	0	0	0	0
Elaeis_14_1	0	0	1	1	1	0	1	1	1	1	1	1	1	1	1	0	0	12
Elaeis_14_4	0	0	0	0	0	0	0	1	0	0	0	0	0	0	0	0	0	1
Elaeis_14_6	1	1	1	1	0	1	0	1	1	1	1	1	1	1	1	1	0	14
Elaeis_14_7	1	0	1	0	1	1	1	1	1	0	1	0	1	1	1	1	1	13
Elaeis_150_0	1	1	1	1	0	0	1	1	1	1	1	1	1	0	1	0	1	13
Elaeis_150_1	1	1	1	1	0	1	0	1	0	1	1	0	0	1	0	1	1	11
Elaeis_150_2	1	1	0	1	0	1	1	0	1	1	0	0	1	0	1	0	0	9
Elaeis_150_3	0	0	1	0	0	0	1	0	1	0	0	1	1	0	0	0	0	5
Elaeis_150_4	1	1	0	1	1	1	0	1	1	1	1	1	1	0	1	1	0	13
Elaeis_150_5	0	1	1	1	0	1	1	1	1	1	1	1	0	0	1	0	0	11
Elaeis_1615_0	0	0	0	0	0	0	0	1	0	0	0	1	0	0	0	1	0	3
Elaeis_1615_1	1	1	0	1	1	1	1	1	1	1	1	1	1	1	1	0	1	15
Elaeis_1615_4	0	1	1	1	1	1	1	1	1	1	1	1	1	1	1	0	1	15
Elaeis_1615_7	0	1	1	1	0	1	1	1	1	1	0	0	1	0	1	1	1	12
Elaeis_164_0	0	0	0	1	1	1	0	1	1	1	1	1	0	0	1	0	0	9
Elaeis_164_10	0	0	0	1	0	0	1	0	0	1	0	1	0	0	0	0	0	4
Elaeis_164_13	0	0	1	0	0	0	0	0	0	0	0	0	0	1	0	0	0	2
Elaeis_164_4	0	0	0	1	0	0	0	1	0	1	0	0	0	0	0	0	1	4
Elaeis_164_5	0	0	0	0	0	0	0	0	0	0	0	0	0	0	0	0	0	0
Elaeis_164_6	1	0	1	1	1	1	1	1	0	1	1	1	1	1	0	1	0	13
Elaeis_1801_0	0	1	1	1	1	0	1	1	1	0	1	0	1	1	1	1	1	13
Elaeis_1801_4	1	1	1	1	1	1	1	1	1	1	1	1	1	1	1	1	1	17
Elaeis_1801_5	0	1	1	1	0	1	0	1	1	1	0	1	0	0	1	1	1	11
Elaeis_1815_1	1	1	1	1	1	1	1	1	1	0	1	1	1	1	1	0	1	15
Elaeis_1815_2	1	1	1	1	1	1	1	1	1	1	1	1	1	1	1	1	1	17
Elaeis_1815_3	1	1	1	1	1	1	1	1	1	1	1	1	1	1	1	1	1	17
Elaeis_1815_5	1	1	1	1	0	1	1	1	1	1	1	1	1	1	1	1	1	16
Elaeis_1815_6	1	1	1	1	0	1	1	1	1	1	1	1	1	1	1	1	1	16
Elaeis_1815_8	1	1	1	0	1	1	1	1	1	1	1	1	1	1	1	1	1	16
Elaeis_182_1	0	0	0	0	0	0	0	0	0	0	0	0	1	0	0	1	1	3
Elaeis_182_10	0	1	1	1	1	1	1	0	1	1	1	1	1	1	1	1	1	15
Elaeis_182_4	0	0	0	0	0	0	0	0	0	0	0	0	0	0	0	0	0	0
Elaeis_182_9	1	1	1	0	0	1	1	1	1	1	1	0	1	1	1	1	1	14
Elaeis_1842_1	0	0	0	1	0	1	1	0	1	1	0	0	1	1	0	1	0	8
Elaeis_1842_2	1	0	1	1	1	1	1	1	1	1	0	0	1	1	1	1	0	13
Elaeis_1842_4	1	1	1	1	1	1	1	1	1	1	1	1	1	1	1	1	1	17
Elaeis_1854_0	1	1	1	1	1	1	1	1	0	1	1	1	0	1	1	0	0	13
Elaeis_1854_1	1	1	1	1	1	1	1	1	0	1	1	1	1	1	1	1	1	16
Elaeis_1854_3	1	1	1	0	1	1	1	1	1	1	1	1	1	1	1	1	1	16
Elaeis_1854_4	0	0	0	0	0	0	0	0	1	1	0	0	0	0	1	1	0	4
Elaeis_1877_0	1	1	1	1	1	1	1	1	1	0	0	0	1	1	1	1	1	14
Elaeis_1877_1	1	1	1	1	1	1	1	1	1	1	1	1	1	1	1	1	1	17
Elaeis_1877_2	1	1	0	1	1	1	1	1	1	1	1	1	1	1	1	1	1	16
Elaeis_1877_3	0	1	0	0	0	1	0	0	0	0	1	0	0	1	1	1	1	7
Elaeis_1877_4	0	1	0	0	0	1	0	0	0	0	1	0	0	1	1	1	1	7
Elaeis_1877_5	0	1	0	0	0	0	0	0	0	0	0	0	0	0	0	0	0	1
Elaeis_1901_0	1	1	1	1	1	1	0	1	1	1	1	1	1	1	1	1	1	16
Elaeis_1901_2	1	1	1	0	1	1	1	1	1	1	1	1	1	1	1	1	1	16
Elaeis_1901_5	1	1	1	0	1	1	1	1	1	1	1	1	1	1	1	1	0	15
Elaeis_1901_6	1	1	0	1	1	1	1	1	1	1	1	0	1	0	1	0	1	13
Elaeis_191_0	1	0	0	0	0	0	0	0	0	0	1	0	1	0	0	0	0	3
Elaeis_191_1	1	1	1	0	0	1	1	1	1	1	1	1	1	1	0	0	1	13
Elaeis_191_7	1	1	1	1	0	1	0	0	1	1	1	1	1	1	1	0	1	13
Elaeis_194_0	1	1	1	1	0	1	1	1	0	1	0	1	0	1	1	1	1	13
Elaeis_194_10	1	1	1	1	1	1	0	1	1	1	1	1	1	0	1	1	1	15
Elaeis_194_11	1	1	1	1	1	1	0	1	1	1	1	1	1	0	1	1	1	15
Elaeis_197_1	1	1	1	0	1	1	1	1	0	1	1	1	1	1	0	1	1	14
Elaeis_197_2	1	1	1	1	1	1	1	1	0	1	0	1	1	0	1	1	1	14
Elaeis_197_4	1	1	1	1	1	1	1	1	0	1	1	1	0	1	1	1	1	15
Elaeis_197_5	0	1	1	1	1	0	0	1	0	1	0	1	0	1	0	1	1	10
Elaeis_1986_0	1	1	1	0	0	1	1	1	1	0	1	0	1	1	1	0	1	12
Elaeis_1986_1	0	1	0	0	1	0	1	1	1	1	1	1	0	1	1	1	1	12
Elaeis_1986_4	0	0	1	0	1	0	1	0	0	1	0	1	0	1	1	1	1	9
Elaeis_201_1	1	1	0	0	1	1	1	1	1	0	0	1	1	0	0	1	1	11
Elaeis_201_10	1	1	1	0	1	1	1	1	0	1	1	1	1	1	0	1	0	13
Elaeis_201_7	0	0	0	0	0	0	0	0	0	0	0	0	0	0	0	0	0	0
Elaeis_204_0	1	0	1	1	1	1	0	0	0	0	1	0	1	0	0	0	0	7
Elaeis_204_1	0	0	0	0	0	0	0	0	0	0	0	0	0	0	0	0	0	0
Elaeis_204_11	1	1	1	1	1	1	0	1	1	1	1	1	1	1	1	1	1	16
Elaeis_204_12	1	1	1	1	1	1	0	0	1	1	1	0	1	0	1	1	1	13
Elaeis_204_13	1	0	0	1	1	1	0	0	0	0	1	0	1	1	0	0	0	7
Elaeis_204_16	1	0	0	1	1	1	0	0	0	0	1	0	1	1	0	0	0	7
Elaeis_204_4	1	1	0	0	0	0	0	1	1	1	0	1	1	1	1	0	0	9
Elaeis_204_5	0	1	0	1	0	0	0	0	0	0	0	1	0	0	0	0	0	3
Elaeis_204_6	0	0	1	0	0	0	0	0	1	0	0	0	0	0	0	0	0	2
Elaeis_204_8	1	1	1	1	1	1	0	1	0	1	0	0	1	1	1	1	1	13
Elaeis_204_9	1	1	1	1	1	1	1	1	1	1	1	1	0	1	0	1	1	15
Elaeis_2056_0	0	0	1	0	0	1	0	1	1	0	1	1	1	1	0	0	1	9
Elaeis_2056_1	1	1	1	1	1	1	1	1	1	1	1	1	1	1	1	1	1	17
Elaeis_2056_3	1	1	1	1	1	1	1	1	1	1	1	1	1	1	1	1	1	17
Elaeis_2056_4	1	1	1	1	1	1	1	1	1	1	1	1	1	1	1	1	1	17
Elaeis_2056_5	1	1	1	1	1	1	1	1	1	1	1	1	1	1	1	1	1	17
Elaeis_2056_8	0	1	0	0	1	0	0	0	0	0	0	0	0	0	0	0	0	2
Elaeis_207_0	1	1	1	0	1	1	1	1	0	1	1	1	1	1	1	1	1	15
Elaeis_207_1	1	1	1	0	1	1	1	1	1	1	1	1	1	1	1	1	1	16
Elaeis_207_2	0	0	0	0	0	0	0	0	0	0	0	0	0	0	0	0	0	0
Elaeis_207_3	0	0	0	0	0	0	0	0	0	0	0	0	0	0	0	0	0	0
Elaeis_207_5	1	1	1	0	1	1	1	0	1	0	1	1	1	1	1	1	1	14
Elaeis_207_7	1	1	1	1	1	1	1	1	1	1	1	1	1	1	1	1	1	17
Elaeis_207_9	0	0	0	0	0	0	0	0	0	1	0	0	1	1	1	1	0	5
Elaeis_2164_1	1	0	1	1	1	1	1	1	1	1	1	0	1	0	1	1	0	13
Elaeis_2164_2	1	1	1	1	1	1	1	1	1	1	1	1	1	1	1	1	1	17
Elaeis_2164_4	0	0	0	0	0	1	1	0	1	0	0	0	0	0	0	1	0	4
Elaeis_218_0	0	0	0	0	0	1	0	0	0	0	1	1	0	0	1	0	1	5
Elaeis_218_1	0	1	0	1	1	0	0	0	0	1	1	1	1	1	1	1	0	10
Elaeis_218_2	0	0	0	0	0	0	0	0	0	0	0	0	0	0	0	0	0	0
Elaeis_218_3	0	0	0	0	0	0	0	0	0	0	0	0	0	0	0	0	0	0
Elaeis_218_4	1	1	1	1	1	1	1	1	1	1	1	1	1	1	1	1	1	17
Elaeis_218_5	1	1	1	0	1	1	1	1	1	1	1	1	1	1	1	1	0	15
Elaeis_218_6	1	1	1	1	1	1	1	0	1	1	1	1	1	1	1	1	1	16
Elaeis_218_7	1	1	0	1	1	0	1	1	1	0	0	1	1	0	0	1	1	11
Elaeis_21_0	1	0	0	1	1	1	1	0	1	1	1	1	0	1	0	1	1	12
Elaeis_21_1	1	1	1	1	1	1	1	1	1	1	0	1	1	1	1	1	1	16
Elaeis_21_8	1	1	1	0	1	0	1	1	1	1	1	1	1	1	0	1	1	14
Elaeis_2238_0	0	0	0	0	0	0	0	0	0	0	0	0	0	0	0	0	0	0
Elaeis_2238_1	0	0	1	0	1	0	1	1	1	0	1	1	1	0	1	1	1	11
Elaeis_2238_5	1	1	1	1	1	1	1	1	1	1	1	1	1	1	1	0	1	16
Elaeis_2238_6	1	1	1	0	1	1	1	1	1	1	1	0	1	1	1	1	1	15
Elaeis_226_0	1	1	1	1	1	1	1	1	1	1	1	1	1	1	1	1	0	16
Elaeis_226_1	0	1	0	0	0	0	0	0	0	0	0	0	1	0	0	0	0	2
Elaeis_226_2	0	0	1	0	0	0	0	0	1	0	1	1	0	0	0	1	0	5
Elaeis_226_3	0	1	0	0	0	0	0	0	0	0	0	0	0	0	0	0	0	1
Elaeis_226_4	1	1	1	1	1	1	1	1	0	1	1	1	1	0	1	1	0	14
Elaeis_226_7	0	0	1	1	0	0	0	0	0	0	0	0	1	0	0	0	0	3
Elaeis_2291_5	1	1	1	1	1	1	1	1	1	1	1	0	1	1	1	0	1	15
Elaeis_2291_6	1	1	1	0	1	1	1	1	0	1	1	0	1	1	1	0	1	13
Elaeis_2291_7	1	1	1	1	1	1	1	1	1	1	0	1	1	1	0	1	1	15
Elaeis_2291_8	1	1	1	1	1	1	1	1	1	1	0	1	1	1	1	1	1	16
Elaeis_2291_9	1	1	0	1	0	1	1	1	0	0	0	1	1	1	0	0	1	10
Elaeis_231_1	1	1	1	1	1	1	1	1	1	1	1	1	1	1	1	0	0	15
Elaeis_231_2	1	1	1	1	1	1	1	1	0	1	1	1	1	1	1	1	1	16
Elaeis_231_3	1	1	1	1	1	1	1	1	1	1	1	1	1	1	0	1	1	16
Elaeis_231_5	1	1	1	1	1	1	1	1	1	1	1	1	1	1	0	1	1	16
Elaeis_231_6	1	1	1	1	1	1	1	1	1	1	1	1	1	1	1	1	1	17
Elaeis_231_7	1	1	1	1	1	1	1	1	1	1	1	0	1	1	1	1	1	16
Elaeis_231_8	1	1	0	1	1	1	1	1	1	1	1	1	1	1	1	1	0	15
Elaeis_2339_1	1	1	0	1	0	1	1	1	1	1	0	0	1	1	1	1	1	13
Elaeis_2339_2	1	0	0	1	0	1	1	1	1	1	0	1	0	1	0	1	1	11
Elaeis_2339_3	1	1	0	0	0	0	0	0	0	0	0	0	1	0	0	1	1	5
Elaeis_2363_0	0	0	0	0	0	1	0	0	0	0	0	0	0	1	0	0	0	2
Elaeis_2363_10	1	1	1	0	1	1	1	1	1	1	1	1	0	1	1	1	1	15
Elaeis_2363_3	1	0	1	1	1	1	0	1	0	1	1	1	0	1	1	1	1	13
Elaeis_2363_8	1	1	1	0	1	1	1	1	1	0	1	1	1	1	1	1	1	15
Elaeis_2370_0	0	0	0	0	0	0	0	0	0	0	0	0	0	0	0	0	0	0
Elaeis_2370_1	1	1	1	1	1	1	1	1	1	1	1	1	1	1	1	1	1	17
Elaeis_2370_2	0	1	1	0	1	1	1	1	1	0	1	1	1	0	1	1	1	13
Elaeis_2370_3	0	0	0	1	1	0	1	0	0	0	1	1	0	1	0	0	0	6
Elaeis_2370_6	0	1	0	1	0	1	1	0	0	1	0	0	0	1	1	0	0	7
Elaeis_2377_0	1	1	0	1	0	1	1	1	1	1	0	1	1	1	0	0	1	12
Elaeis_2377_7	1	1	0	1	0	0	0	1	1	0	1	1	0	1	0	1	0	9
Elaeis_237_0	0	1	1	0	0	0	0	0	1	1	0	0	0	1	0	0	0	5
Elaeis_237_1	0	1	1	0	0	0	1	1	1	1	0	1	1	1	1	1	1	12
Elaeis_237_4	0	1	1	1	1	1	1	1	1	1	1	1	1	1	1	1	1	16
Elaeis_237_6	1	1	1	1	1	1	1	1	1	1	1	1	1	1	0	1	1	16
Elaeis_237_8	1	1	1	1	1	1	0	1	1	1	1	1	1	1	1	1	1	16
Elaeis_237_9	1	1	1	1	1	1	1	1	1	0	1	0	1	1	0	0	1	13
Elaeis_2388_0	0	0	0	1	1	0	0	0	1	1	1	1	1	0	0	1	0	8
Elaeis_2388_3	1	0	0	1	1	1	0	0	1	1	1	0	1	0	1	0	0	9
Elaeis_2388_4	0	0	0	1	1	0	0	0	1	1	0	0	0	0	1	0	0	5
Elaeis_2459_0	1	1	0	1	1	1	0	0	1	1	1	1	1	0	1	1	1	13
Elaeis_2459_1	0	1	1	1	1	1	1	1	1	1	1	1	1	1	1	1	1	16
Elaeis_2459_3	1	1	1	0	1	1	1	1	1	1	1	1	1	1	1	0	1	15
Elaeis_2459_5	0	1	1	1	1	1	0	1	1	0	1	1	0	1	1	1	1	13
Elaeis_24_0	1	0	1	1	1	1	1	1	1	1	1	1	1	0	1	1	1	15
Elaeis_24_1	1	1	1	1	1	1	1	1	1	1	1	1	1	1	1	1	1	17
Elaeis_24_2	1	1	1	1	1	1	1	1	0	1	1	1	1	0	1	1	1	15
Elaeis_24_3	1	1	0	1	1	1	1	1	0	1	1	1	1	1	1	0	0	13
Elaeis_24_4	1	1	0	1	1	1	1	1	1	1	1	1	1	1	1	1	1	16
Elaeis_24_5	1	1	1	1	1	1	1	1	1	1	1	1	1	1	1	1	1	17
Elaeis_24_6	0	0	0	0	0	0	1	0	1	0	1	1	0	0	0	0	0	4
Elaeis_250_0	1	0	0	1	0	1	0	0	0	1	1	0	1	0	0	0	0	6
Elaeis_250_1	1	0	0	1	0	1	0	0	0	0	0	0	1	0	0	0	0	4
Elaeis_250_3	0	0	0	1	0	0	0	0	0	0	0	0	0	0	0	0	0	1
Elaeis_250_4	1	0	1	1	1	1	1	0	1	1	0	0	1	0	0	0	0	9
Elaeis_250_5	1	0	1	1	1	1	0	1	1	0	1	0	1	0	0	1	1	11
Elaeis_250_6	1	1	1	1	1	1	1	0	1	1	1	0	1	0	0	0	1	12
Elaeis_250_7	1	1	1	1	1	1	0	0	0	0	1	0	1	1	0	0	1	10
Elaeis_252_0	1	1	1	1	1	1	1	1	1	1	1	1	1	1	1	1	1	17
Elaeis_252_1	1	1	1	1	1	1	1	1	1	1	1	1	1	0	1	1	1	16
Elaeis_252_2	1	1	1	1	1	1	1	1	1	1	1	1	1	1	1	1	1	17
Elaeis_252_3	1	1	0	1	1	1	1	0	0	1	1	1	1	1	0	1	1	13
Elaeis_252_4	1	1	1	1	1	1	1	1	1	1	1	1	0	1	0	1	1	15
Elaeis_252_5	1	1	1	1	1	0	1	1	1	0	1	0	1	1	1	1	1	14
Elaeis_2550_0	1	0	1	1	0	1	1	1	1	1	1	1	1	1	0	1	1	14
Elaeis_2550_5	0	0	0	0	0	0	0	0	0	0	0	0	0	0	0	0	0	0
Elaeis_2561_1	1	1	0	1	1	1	1	1	1	1	1	1	1	1	1	1	1	16
Elaeis_2561_2	1	1	1	1	1	1	1	1	1	1	1	1	1	1	1	1	1	17
Elaeis_2561_3	1	1	1	1	1	1	0	1	1	0	0	0	0	1	1	1	1	12
Elaeis_257_0	1	1	1	0	1	1	0	1	0	0	0	0	0	1	0	0	0	7
Elaeis_257_1	1	1	1	0	1	1	0	1	0	1	0	1	0	1	1	0	1	11
Elaeis_257_10	1	0	0	1	1	0	1	1	1	0	1	0	1	1	1	0	1	11
Elaeis_257_2	1	1	1	1	1	1	1	1	1	1	1	1	1	1	1	1	1	17
Elaeis_257_8	1	0	1	0	1	1	1	1	1	1	1	1	1	1	1	1	1	15
Elaeis_269_0	1	1	0	1	1	1	1	1	1	1	1	1	1	1	1	1	1	16
Elaeis_269_4	1	1	0	0	1	0	1	0	1	1	1	1	0	0	1	0	0	9
Elaeis_277_0	0	0	0	0	0	0	1	0	0	0	1	0	1	1	0	0	1	5
Elaeis_277_2	1	1	0	1	1	1	1	1	0	1	0	0	1	0	1	0	1	11
Elaeis_280_0	0	1	1	0	1	0	1	1	0	1	0	0	0	0	1	1	1	9
Elaeis_280_1	0	1	1	0	1	0	1	1	1	1	0	1	1	1	1	1	1	13
Elaeis_280_2	0	0	1	0	1	0	1	1	1	0	1	1	1	0	1	1	1	11
Elaeis_280_3	0	1	1	0	1	0	1	1	1	1	1	1	1	1	1	1	1	14
Elaeis_280_4	1	1	1	0	1	1	1	1	1	1	1	1	1	1	1	1	1	16
Elaeis_280_5	1	1	1	1	1	1	1	1	1	1	1	1	1	1	1	1	1	17
Elaeis_280_6	1	1	1	1	1	1	1	1	1	1	1	1	1	1	1	1	1	17
Elaeis_280_7	1	1	1	1	1	1	1	1	1	1	1	1	1	1	1	1	1	17
Elaeis_280_8	1	1	1	1	1	1	1	1	1	1	1	1	1	1	1	1	1	17
Elaeis_280_9	1	1	1	1	1	1	1	1	1	1	1	1	1	1	1	1	1	17
Elaeis_281_0	0	0	0	0	0	0	0	0	0	0	0	0	0	0	0	0	0	0
Elaeis_281_1	0	1	0	1	0	0	1	0	0	0	1	0	1	0	0	1	0	6
Elaeis_281_2	1	1	1	1	1	1	1	1	1	1	1	1	0	1	1	1	1	16
Elaeis_281_3	0	0	0	0	0	1	0	1	0	0	0	0	0	0	0	0	0	2
Elaeis_282_1	0	1	0	0	0	0	0	0	0	0	0	0	0	0	0	1	0	2
Elaeis_282_2	1	1	0	1	0	1	0	0	1	1	0	0	1	0	1	0	1	9
Elaeis_282_3	0	1	0	0	0	0	0	1	0	0	0	0	1	1	0	0	0	4
Elaeis_282_4	0	0	0	0	0	0	0	1	0	0	1	1	1	1	0	0	0	5
Elaeis_282_7	0	1	0	1	1	0	0	1	0	1	1	1	1	1	1	0	1	11
Elaeis_282_8	0	1	1	0	1	0	1	0	0	0	1	1	1	1	0	1	0	9
Elaeis_282_9	1	0	1	0	1	0	1	1	0	0	1	1	0	1	0	1	1	10
Elaeis_290_0	0	0	0	0	0	0	0	0	0	0	0	0	0	0	0	0	0	0
Elaeis_290_1	1	0	0	1	1	1	0	0	0	0	0	0	1	0	0	0	0	5
Elaeis_290_2	1	1	0	1	1	1	0	0	0	1	1	0	1	0	0	0	0	8
Elaeis_290_8	0	0	0	0	0	0	0	0	0	0	0	0	0	0	0	0	0	0
Elaeis_293_1	1	0	1	1	1	1	1	1	1	0	1	1	1	1	1	0	1	14
Elaeis_293_2	1	1	1	1	1	1	1	1	1	0	1	1	1	1	0	1	1	15
Elaeis_293_3	1	1	0	0	1	1	1	1	1	1	1	1	1	1	1	1	1	15
Elaeis_293_4	1	0	0	0	0	1	0	1	1	0	1	1	1	1	0	1	1	10
Elaeis_299_0	0	0	1	0	0	0	0	0	0	0	0	0	0	0	0	0	0	1
Elaeis_299_1	1	0	1	1	1	1	1	1	1	1	1	0	1	1	1	1	1	15
Elaeis_299_2	0	0	0	1	1	0	0	0	1	0	0	0	0	1	0	0	0	4
Elaeis_299_3	1	0	0	1	1	1	0	1	1	1	0	1	0	0	1	1	1	11
Elaeis_305_1	1	1	0	0	0	1	1	1	1	1	1	1	1	1	1	0	1	13
Elaeis_305_2	1	1	1	1	1	1	1	1	1	1	1	1	1	1	1	1	1	17
Elaeis_305_6	0	1	1	0	1	1	1	1	1	0	0	1	1	1	1	1	0	12
Elaeis_305_7	1	1	1	1	1	1	1	1	1	1	1	1	1	1	1	1	1	17
Elaeis_310_0	0	0	0	0	0	0	1	0	0	0	0	0	0	0	0	0	1	2
Elaeis_310_1	1	1	1	1	1	1	1	0	1	1	0	1	0	1	1	1	1	14
Elaeis_310_2	1	1	1	1	1	1	0	1	0	1	1	1	1	1	1	1	1	15
Elaeis_310_4	1	1	1	1	1	1	1	1	1	1	1	1	1	1	1	1	1	17
Elaeis_310_5	1	1	1	1	1	1	1	1	1	1	1	1	1	1	1	1	1	17
Elaeis_310_7	0	0	0	1	0	0	0	0	0	0	0	0	1	0	0	0	0	2
Elaeis_31_0	0	0	0	0	0	0	0	0	0	0	0	0	0	0	0	0	0	0
Elaeis_31_1	0	0	0	0	0	0	0	0	0	0	0	0	0	0	0	0	0	0
Elaeis_31_4	0	0	0	0	0	0	0	0	0	0	0	0	0	1	0	0	1	2
Elaeis_323_0	0	0	0	0	0	0	0	0	0	0	0	0	0	0	0	0	0	0
Elaeis_323_1	0	0	0	1	0	0	0	0	0	0	0	0	0	1	0	0	0	2
Elaeis_323_10	1	1	1	1	1	1	1	1	1	1	1	1	1	1	1	1	1	17
Elaeis_323_13	1	0	0	0	0	0	0	0	0	1	1	0	0	0	0	0	0	3
Elaeis_32_1	0	0	0	0	0	0	0	1	0	0	0	0	0	0	0	0	0	1
Elaeis_32_2	1	1	1	1	1	1	1	1	1	1	1	1	1	1	1	1	1	17
Elaeis_32_5	1	1	1	0	1	1	1	1	1	1	1	1	1	1	1	1	1	16
Elaeis_32_7	1	1	1	1	1	1	1	1	1	1	1	1	1	1	1	1	1	17
Elaeis_32_8	1	1	0	1	1	1	1	1	0	1	1	1	1	1	1	1	1	15
Elaeis_332_1	1	1	1	0	1	0	1	1	1	1	0	1	0	1	1	1	1	13
Elaeis_332_4	1	1	1	1	1	1	1	1	1	1	1	1	0	1	0	1	1	15
Elaeis_332_5	1	1	1	1	1	1	1	1	1	1	1	1	0	1	0	1	1	15
Elaeis_340_1	0	1	0	0	0	0	0	0	0	0	0	0	0	0	0	1	0	2
Elaeis_340_2	0	0	0	0	1	0	0	0	0	0	0	1	0	0	0	0	1	3
Elaeis_340_3	0	0	0	0	0	0	0	0	0	0	0	0	1	0	0	0	0	1
Elaeis_340_4	0	0	0	0	0	0	0	0	0	0	0	0	0	0	0	0	0	0
Elaeis_357_1	0	1	1	0	1	1	1	1	1	1	1	1	1	1	1	1	1	15
Elaeis_357_2	1	1	1	1	1	1	0	1	1	1	1	0	1	1	1	1	0	14
Elaeis_357_3	1	1	1	1	1	1	1	1	1	1	1	1	1	1	1	1	1	17
Elaeis_357_4	1	1	1	1	1	1	1	1	1	1	1	1	1	1	1	1	1	17
Elaeis_357_5	1	1	1	1	0	1	1	0	1	1	1	1	1	1	1	1	1	15
Elaeis_357_6	0	0	0	0	0	0	0	0	0	0	0	0	0	0	0	0	0	0
Elaeis_362_0	1	1	1	0	1	1	0	0	1	0	1	0	0	0	1	0	1	9
Elaeis_362_1	1	1	0	1	1	1	0	0	1	1	1	1	1	0	1	1	1	13
Elaeis_362_2	1	1	1	1	1	1	0	1	1	1	0	1	1	0	1	0	1	13
Elaeis_362_4	1	1	1	0	0	1	0	1	1	0	1	1	0	0	1	1	0	10
Elaeis_363_0	1	1	1	1	1	1	0	0	1	1	1	1	1	0	1	1	1	14
Elaeis_363_2	0	0	0	0	0	0	0	0	0	0	0	0	0	0	0	0	0	0
Elaeis_363_3	0	0	0	0	0	0	0	0	0	0	0	0	0	0	0	0	0	0
Elaeis_363_7	1	0	0	0	1	1	0	0	1	0	0	1	1	0	1	1	0	8
Elaeis_369_0	1	1	1	1	1	1	1	1	1	1	1	1	1	1	1	1	0	16
Elaeis_369_1	0	0	0	0	0	0	0	0	1	0	0	0	0	0	0	0	0	1
Elaeis_369_10	1	1	1	1	1	1	1	1	1	0	1	1	1	0	1	1	1	15
Elaeis_369_11	1	1	1	1	1	1	0	1	1	1	1	1	1	1	1	1	1	16
Elaeis_369_13	1	1	1	0	1	0	1	1	1	1	0	1	1	0	0	1	1	12
Elaeis_369_14	1	1	1	0	1	1	1	1	1	1	1	1	1	1	1	1	1	16
Elaeis_369_16	1	1	0	1	1	1	1	1	1	1	1	1	1	1	0	1	1	15
Elaeis_369_17	1	0	1	1	0	1	1	1	1	1	1	1	1	1	1	1	1	15
Elaeis_369_3	0	0	0	0	0	0	0	0	0	0	0	0	0	0	0	0	0	0
Elaeis_369_7	1	1	1	1	1	1	1	1	1	1	1	1	1	1	1	1	1	17
Elaeis_369_8	1	1	1	0	0	1	1	1	1	1	1	1	1	1	1	0	1	14
Elaeis_369_9	1	1	1	1	1	1	1	1	1	1	1	1	1	1	1	1	1	17
Elaeis_378_0	0	0	0	0	0	0	0	0	0	0	1	0	0	0	0	0	0	1
Elaeis_378_1	0	1	1	0	1	1	0	1	0	1	1	1	0	1	1	0	0	10
Elaeis_378_3	0	0	0	1	1	1	0	0	0	1	1	0	1	0	1	0	0	7
Elaeis_378_4	0	0	0	0	1	1	0	0	0	0	1	0	1	0	0	0	0	4
Elaeis_378_5	1	1	1	0	0	1	0	1	1	1	0	0	0	1	1	1	1	11
Elaeis_38_0	1	1	1	0	1	1	1	1	1	1	1	1	1	1	1	1	0	15
Elaeis_38_4	1	1	1	1	0	1	0	1	0	1	1	0	1	1	0	1	1	12
Elaeis_38_5	0	1	1	1	0	1	1	1	0	1	0	0	1	1	0	1	1	11
Elaeis_38_6	0	0	0	0	0	1	1	1	0	1	0	0	1	1	1	1	1	9
Elaeis_391_1	1	1	0	1	0	1	1	1	1	1	1	0	1	1	1	1	0	13
Elaeis_391_10	0	0	0	0	1	0	0	0	1	0	0	1	0	0	1	0	0	4
Elaeis_391_3	1	1	1	1	1	1	1	1	1	1	1	1	1	1	1	1	1	17
Elaeis_391_5	1	1	1	1	1	1	1	1	1	1	1	1	1	1	1	1	1	17
Elaeis_391_7	1	1	1	1	1	1	1	1	1	1	1	1	1	1	1	1	1	17
Elaeis_391_8	1	1	0	1	1	1	1	0	1	1	1	1	1	0	1	1	1	14
Elaeis_391_9	1	1	0	1	1	1	1	0	1	1	1	0	1	0	1	1	1	13
Elaeis_392_2	1	1	1	1	1	1	1	1	1	1	0	1	1	1	1	1	1	16
Elaeis_392_4	1	0	1	1	1	1	1	1	1	0	0	0	1	0	1	1	1	12
Elaeis_415_1	1	1	1	1	1	1	1	1	1	1	1	1	1	1	1	1	1	17
Elaeis_415_5	1	1	1	1	1	0	1	1	1	1	1	1	0	1	1	1	1	15
Elaeis_415_7	1	1	0	0	1	1	0	1	1	0	1	0	0	1	1	1	1	11
Elaeis_421_1	0	1	1	1	1	1	1	1	0	1	1	0	0	1	1	1	1	13
Elaeis_421_2	0	1	1	1	1	1	1	1	1	1	1	1	1	1	1	1	1	16
Elaeis_421_3	1	1	0	0	1	0	1	1	1	1	1	0	1	1	1	1	1	13
Elaeis_429_0	0	0	0	0	0	0	0	0	0	0	0	0	0	0	0	0	0	0
Elaeis_429_1	0	0	0	1	1	0	0	0	0	0	0	0	0	0	0	0	0	2
Elaeis_429_2	0	0	0	1	0	0	0	0	1	0	0	0	0	0	0	1	0	3
Elaeis_429_3	0	0	0	0	0	0	0	0	0	0	0	1	0	0	0	0	0	1
Elaeis_429_4	1	1	1	1	1	1	1	1	1	0	1	1	1	0	1	1	1	15
Elaeis_429_5	1	1	0	0	0	0	0	1	0	0	1	0	0	0	0	1	1	6
Elaeis_449_0	1	0	1	1	1	1	1	1	1	1	1	0	1	0	1	0	1	13
Elaeis_449_1	0	0	0	0	1	0	0	0	1	1	0	0	0	0	1	0	0	4
Elaeis_449_4	1	1	1	0	1	1	1	1	1	1	1	1	1	1	1	1	1	16
Elaeis_449_5	1	1	1	0	1	1	1	1	1	1	1	1	1	1	1	1	1	16
Elaeis_449_7	0	0	0	0	0	0	0	0	0	0	0	0	0	0	0	0	0	0
Elaeis_449_9	0	1	0	1	1	1	1	1	0	0	1	1	1	1	0	1	0	11
Elaeis_464_0	0	0	0	1	1	1	0	0	0	1	0	1	0	0	1	1	1	8
Elaeis_464_1	1	0	0	1	0	0	0	0	0	0	1	0	1	0	1	1	0	6
Elaeis_464_3	1	1	1	1	1	1	1	1	1	1	1	1	0	1	1	1	1	16
Elaeis_464_4	1	1	1	1	0	1	1	1	1	1	1	1	1	1	0	1	1	15
Elaeis_464_5	0	0	0	1	0	0	1	1	1	0	0	0	0	1	0	1	1	7
Elaeis_484_1	0	1	0	0	0	0	0	0	0	0	0	0	0	0	0	0	0	1
Elaeis_484_8	1	1	1	1	1	1	1	1	1	1	0	1	1	1	1	1	1	16
Elaeis_490_0	1	1	1	0	1	1	1	1	1	1	1	1	1	1	0	0	1	14
Elaeis_490_2	1	1	0	1	1	1	1	1	1	1	1	1	1	1	1	1	1	16
Elaeis_490_3	1	1	1	0	1	1	1	1	1	1	1	1	1	1	1	1	1	16
Elaeis_490_4	1	1	1	1	1	1	1	1	1	1	1	1	0	1	1	1	1	16
Elaeis_497_0	1	1	1	1	1	1	1	1	1	0	1	1	1	1	1	0	1	15
Elaeis_497_1	1	1	1	0	1	1	1	1	1	1	1	1	1	1	1	1	1	16
Elaeis_497_2	1	1	1	1	0	1	1	1	1	1	1	1	1	1	1	1	1	16
Elaeis_497_3	0	0	0	0	0	0	0	0	0	0	0	0	0	0	0	0	0	0
Elaeis_514_0	1	0	0	0	0	0	1	0	1	0	1	0	1	1	0	0	1	7
Elaeis_514_1	1	0	1	1	0	0	0	1	1	1	1	1	1	0	1	1	0	11
Elaeis_51_1	0	0	0	0	0	0	0	0	0	0	0	0	0	0	0	0	0	0
Elaeis_51_12	0	0	1	0	1	1	1	1	1	1	0	0	1	1	0	1	1	11
Elaeis_51_2	1	1	1	1	1	1	1	1	1	1	1	1	1	1	0	1	1	16
Elaeis_51_6	0	0	0	0	0	0	0	0	0	0	0	0	0	0	0	0	0	0
Elaeis_51_9	1	1	1	1	1	1	1	1	1	1	1	1	1	1	1	1	1	17
Elaeis_52_1	1	1	1	1	1	1	0	1	1	1	1	1	1	1	1	1	1	16
Elaeis_52_13	0	0	0	1	1	0	0	0	0	0	1	0	0	0	0	1	0	4
Elaeis_52_4	1	1	0	0	1	1	1	1	1	1	1	1	1	1	1	1	1	15
Elaeis_52_5	1	0	1	0	1	1	1	1	1	0	0	0	0	0	1	1	1	10
Elaeis_563_1	1	1	1	0	1	1	0	1	1	1	0	0	1	0	1	0	1	11
Elaeis_563_4	1	1	1	1	1	1	1	1	1	1	1	1	1	1	1	1	1	17
Elaeis_563_5	1	1	0	1	1	1	1	1	1	1	1	1	0	1	1	1	1	15
Elaeis_563_6	1	1	1	1	1	1	1	1	1	1	1	1	1	1	1	0	1	16
Elaeis_563_7	1	1	1	1	1	1	1	1	1	1	1	1	1	1	1	0	1	16
Elaeis_563_8	1	1	1	1	1	1	1	1	1	1	1	1	1	1	1	1	0	16
Elaeis_563_9	0	1	1	1	0	1	1	0	0	1	1	1	0	1	1	0	1	11
Elaeis_576_0	0	0	0	0	0	0	0	0	0	0	0	0	0	0	0	0	0	0
Elaeis_576_12	0	0	0	1	0	0	1	0	0	0	0	0	0	0	0	1	0	3
Elaeis_604_0	1	1	1	1	1	1	1	1	0	1	1	1	0	1	1	1	1	15
Elaeis_604_1	1	1	1	1	1	1	1	1	1	1	1	0	1	1	1	1	1	16
Elaeis_604_2	1	1	1	1	1	1	1	1	0	1	1	1	1	1	1	1	1	16
Elaeis_604_3	1	0	1	0	1	1	1	1	1	1	1	1	1	1	0	1	0	13
Elaeis_609_0	0	1	1	0	0	0	0	0	0	0	0	0	0	1	0	0	0	3
Elaeis_609_1	1	1	0	1	0	1	0	0	1	0	0	0	1	0	1	1	0	8
Elaeis_609_10	1	1	1	1	1	1	1	1	1	1	1	1	1	1	1	1	1	17
Elaeis_609_11	1	1	1	1	1	1	0	1	1	1	1	1	0	1	1	1	0	14
Elaeis_609_2	1	1	1	1	1	1	1	1	1	1	1	1	1	1	1	0	1	16
Elaeis_609_3	1	0	0	0	0	0	0	0	0	0	0	0	0	0	0	0	0	1
Elaeis_609_9	1	1	1	1	1	1	1	1	1	1	1	1	1	1	1	1	1	17
Elaeis_629_1	0	0	0	0	0	0	0	0	0	0	1	0	0	0	0	0	0	1
Elaeis_629_4	1	1	1	1	1	1	1	1	1	1	1	1	1	1	1	1	1	17
Elaeis_629_7	0	1	0	1	1	1	1	0	0	0	1	1	1	0	0	1	0	9
Elaeis_630_1	1	1	1	1	1	1	1	1	1	1	1	1	1	1	1	0	1	16
Elaeis_630_2	1	1	1	1	1	1	1	1	1	1	1	1	1	1	1	1	1	17
Elaeis_630_3	1	1	1	1	1	1	1	1	1	1	1	0	1	1	1	1	1	16
Elaeis_630_6	0	1	1	1	1	0	1	0	1	1	0	1	0	1	1	1	1	12
Elaeis_637_1	1	1	1	1	1	0	1	0	1	1	0	1	1	0	1	0	1	12
Elaeis_637_5	1	1	1	1	1	1	1	1	1	1	1	1	1	1	1	1	1	17
Elaeis_637_7	0	0	0	0	0	0	0	0	0	0	0	0	0	0	0	0	0	0
Elaeis_637_9	0	1	0	0	1	1	1	1	1	0	0	1	1	1	1	1	1	12
Elaeis_673_0	0	0	1	0	0	0	0	0	0	0	0	0	0	0	0	1	0	2
Elaeis_673_12	1	0	0	0	1	1	1	1	0	1	1	1	1	1	0	1	1	12
Elaeis_673_13	1	1	1	1	1	1	1	1	1	1	1	1	1	1	1	1	0	16
Elaeis_673_14	1	1	1	0	1	1	1	1	1	1	1	1	1	1	1	1	1	16
Elaeis_673_15	1	1	1	1	1	1	1	1	1	1	1	1	1	1	1	1	1	17
Elaeis_673_16	1	0	0	0	1	1	1	1	1	1	1	0	1	0	1	1	1	12
Elaeis_673_5	1	1	1	1	1	1	0	1	1	1	1	1	1	1	1	1	1	16
Elaeis_673_6	1	1	1	0	1	1	1	1	1	0	1	1	1	1	1	1	1	15
Elaeis_673_8	1	1	1	1	1	1	1	1	1	1	1	1	1	1	1	1	1	17
Elaeis_673_9	0	0	0	0	0	0	0	0	0	0	0	0	0	0	0	0	0	0
Elaeis_680_0	1	1	1	0	1	1	1	1	1	1	1	1	0	0	1	1	0	13
Elaeis_680_1	1	1	1	1	1	1	1	1	1	1	1	1	1	1	0	1	1	16
Elaeis_680_2	1	1	1	1	1	1	1	1	1	1	0	1	1	1	0	1	1	15
Elaeis_680_6	0	0	0	0	0	0	1	0	0	1	0	0	1	0	0	0	0	3
Elaeis_680_7	1	1	1	0	1	1	1	0	1	1	1	1	1	1	0	1	1	14
Elaeis_717_0	1	1	1	1	1	1	1	1	1	1	1	1	1	1	1	1	1	17
Elaeis_717_4	0	0	0	0	0	0	0	0	0	0	0	0	0	0	0	0	0	0
Elaeis_717_6	1	1	1	0	1	1	1	1	1	1	1	1	1	1	1	1	1	16
Elaeis_717_8	0	1	0	0	0	0	1	1	1	1	1	1	1	0	1	0	1	10
Elaeis_727_0	0	1	1	1	1	1	1	1	1	1	1	1	1	1	1	1	1	16
Elaeis_727_1	1	1	1	1	1	1	1	1	1	1	1	1	1	1	1	1	1	17
Elaeis_727_10	1	0	1	1	1	1	1	1	1	1	1	1	1	0	1	1	1	15
Elaeis_727_2	1	1	1	1	0	1	1	1	1	1	1	1	1	1	1	1	1	16
Elaeis_727_3	1	1	1	1	1	1	1	1	1	1	1	1	1	1	1	1	1	17
Elaeis_727_4	0	0	0	0	0	0	0	0	0	0	0	0	0	0	0	0	0	0
Elaeis_727_5	1	1	1	1	1	1	1	1	1	1	1	1	1	1	1	1	1	17
Elaeis_732_1	0	1	0	0	1	0	0	1	1	0	0	0	0	0	1	0	0	5
Elaeis_732_6	1	1	1	1	1	1	1	0	1	1	1	1	1	1	1	1	1	16
Elaeis_732_7	0	0	0	0	0	0	0	0	0	0	0	0	0	0	0	0	0	0
Elaeis_740_0	1	0	1	0	1	1	0	1	1	1	1	1	1	1	1	1	1	14
Elaeis_740_1	1	1	1	1	1	1	1	1	1	1	1	1	1	1	1	0	1	16
Elaeis_740_3	1	1	1	1	1	1	1	1	0	1	1	1	1	1	1	1	1	16
Elaeis_740_5	1	1	0	1	1	1	1	1	1	1	1	1	1	1	0	1	1	15
Elaeis_757_0	1	0	1	0	0	1	0	0	0	0	0	0	0	0	0	1	1	5
Elaeis_757_1	0	0	1	0	0	0	0	0	0	0	0	0	0	0	0	0	0	1
Elaeis_757_2	1	1	0	0	1	1	1	0	0	1	0	1	1	0	1	1	1	11
Elaeis_757_3	1	1	1	1	1	1	1	0	1	1	1	1	1	0	1	1	1	15
Elaeis_757_4	1	1	1	1	1	1	1	1	1	1	1	1	0	1	1	1	1	16
Elaeis_757_5	1	1	0	1	1	1	1	0	1	0	1	1	1	0	1	1	1	13
Elaeis_758_0	0	0	1	0	0	0	0	0	0	0	0	0	0	0	0	0	0	1
Elaeis_758_1	0	1	1	1	1	1	1	1	0	1	1	1	0	1	1	1	1	14
Elaeis_758_10	1	1	1	1	0	1	1	1	1	1	1	1	1	1	1	0	1	15
Elaeis_758_3	1	1	1	0	1	1	1	1	1	1	1	1	1	1	1	1	1	16
Elaeis_758_5	1	1	1	1	1	1	1	1	1	1	1	1	1	1	1	1	1	17
Elaeis_758_6	1	1	1	1	1	1	1	1	1	0	1	1	1	1	1	1	1	16
Elaeis_758_7	1	1	1	0	0	1	0	0	1	0	0	0	0	0	0	0	0	5
Elaeis_758_8	1	0	1	1	1	1	1	1	1	1	1	1	1	1	1	0	1	15
Elaeis_758_9	1	1	1	0	1	1	1	1	1	1	1	1	1	1	1	1	1	16
Elaeis_785_0	0	0	0	0	0	0	0	0	0	0	0	0	0	0	0	1	0	1
Elaeis_785_1	0	0	0	0	0	0	0	0	0	0	0	0	0	0	0	0	0	0
Elaeis_785_2	0	0	0	0	0	0	0	0	0	0	0	0	0	0	0	1	0	1
Elaeis_785_3	0	0	0	0	0	0	0	0	0	0	0	0	0	0	0	0	0	0
Elaeis_793_1	1	0	0	0	1	1	0	0	1	0	0	1	0	1	0	1	1	8
Elaeis_793_4	1	1	1	1	1	1	0	1	1	1	1	0	0	0	0	1	1	12
Elaeis_7_1	0	1	0	0	0	0	0	0	0	0	0	1	0	0	0	0	1	3
Elaeis_7_4	1	1	1	0	1	1	1	1	1	1	1	1	1	1	1	1	1	16
Elaeis_7_5	1	1	1	0	0	1	1	1	1	1	1	1	1	1	1	1	1	15
Elaeis_7_6	1	1	1	0	1	1	1	1	1	1	1	1	1	1	1	1	1	16
Elaeis_7_9	1	1	1	1	1	1	1	1	1	1	1	1	1	1	1	1	1	17
Elaeis_807_0	1	0	1	0	1	1	0	1	1	1	1	0	1	1	1	1	0	12
Elaeis_807_10	1	1	1	0	1	0	1	1	1	1	1	1	1	1	1	1	0	14
Elaeis_807_11	1	1	1	1	1	1	0	1	1	0	1	0	1	1	1	1	1	14
Elaeis_807_12	0	0	0	0	0	0	0	0	0	0	0	0	0	0	0	0	0	0
Elaeis_807_13	0	0	1	0	0	1	0	1	1	0	1	1	1	1	1	0	1	10
Elaeis_807_2	0	0	0	0	0	0	0	0	0	0	0	0	0	0	0	0	0	0
Elaeis_807_4	1	1	1	0	1	1	1	1	1	1	1	1	1	1	1	0	1	15
Elaeis_807_6	0	0	0	0	0	0	0	0	0	0	0	0	0	0	0	0	0	0
Elaeis_807_9	1	1	0	1	0	0	0	1	1	1	1	1	1	1	1	0	1	12
Elaeis_808_1	0	0	0	0	0	0	0	0	0	0	0	0	0	0	0	0	0	0
Elaeis_808_10	1	1	1	0	0	1	1	1	1	1	0	1	0	1	1	1	1	13
Elaeis_808_2	1	0	0	0	0	0	1	1	1	1	1	1	0	0	0	1	0	8
Elaeis_808_3	1	1	1	1	1	1	1	1	1	1	1	1	0	1	1	1	1	16
Elaeis_808_4	1	1	1	0	1	1	0	1	0	1	1	1	1	1	1	1	1	14
Elaeis_808_7	1	1	1	0	0	1	1	1	1	1	1	1	1	1	1	1	1	15
Elaeis_822_1	0	0	0	0	0	0	0	0	1	0	0	1	0	0	0	0	0	2
Elaeis_822_2	1	1	1	1	0	1	1	1	1	0	1	0	0	0	0	1	1	11
Elaeis_822_4	0	0	0	1	1	1	1	1	1	0	1	1	0	1	0	0	1	10
Elaeis_83_1	0	0	0	0	0	0	0	0	0	0	0	0	0	0	0	0	0	0
Elaeis_83_10	0	0	0	0	0	0	0	0	0	0	0	0	0	0	0	0	0	0
Elaeis_83_11	1	0	1	0	1	1	1	1	1	0	1	0	0	0	1	1	1	11
Elaeis_83_12	0	0	0	0	0	0	0	0	0	0	0	0	0	0	0	0	1	1
Elaeis_83_3	1	0	1	0	1	0	1	1	0	1	1	1	1	0	1	0	1	11
Elaeis_83_5	0	1	1	0	1	0	0	1	0	0	1	1	1	1	0	0	0	8
Elaeis_83_7	1	1	1	1	1	1	1	1	0	1	1	1	0	1	1	0	1	14
Elaeis_83_8	1	1	0	1	1	1	1	1	1	0	0	0	0	0	0	1	1	10
Elaeis_84_1	1	0	1	1	1	1	0	1	1	1	0	1	0	1	1	1	1	13
Elaeis_84_12	1	1	0	0	1	1	1	1	1	1	1	1	1	1	0	1	1	14
Elaeis_84_13	1	1	1	0	1	0	0	1	1	1	1	1	1	1	1	0	1	13
Elaeis_84_2	1	0	1	1	1	1	1	1	1	1	1	1	1	1	1	1	1	16
Elaeis_84_8	0	0	0	0	0	0	0	0	0	0	0	0	0	0	0	0	0	0
Elaeis_855_0	0	0	0	0	0	0	0	0	1	1	0	0	0	0	1	0	0	3
Elaeis_855_10	0	1	0	1	1	1	1	1	1	1	1	1	0	1	1	1	1	14
Elaeis_855_12	1	0	1	0	1	1	0	1	1	1	1	1	1	1	1	1	1	14
Elaeis_855_2	0	0	0	0	0	0	0	0	0	0	0	0	0	0	0	0	0	0
Elaeis_855_4	1	1	1	1	1	1	1	1	1	1	1	1	0	1	1	1	1	16
Elaeis_855_6	1	1	1	0	1	1	0	1	1	1	1	1	1	1	1	1	1	15
Elaeis_863_0	0	0	0	0	0	0	0	0	0	0	0	0	0	0	0	1	1	2
Elaeis_863_1	0	0	0	0	0	0	0	0	1	0	0	1	0	0	0	0	0	2
Elaeis_863_2	0	1	1	0	1	1	1	1	1	1	0	1	0	1	1	1	1	13
Elaeis_863_3	0	0	0	0	1	1	1	1	1	1	0	1	0	1	1	1	1	11
Elaeis_863_4	0	1	0	0	1	1	1	1	0	1	0	1	0	0	1	1	1	10
Elaeis_863_5	0	1	1	0	1	1	1	1	1	1	0	1	0	1	1	1	1	13
Elaeis_863_6	0	1	1	0	1	1	1	1	1	1	1	1	0	0	1	1	1	13
Elaeis_863_7	0	0	0	0	1	0	1	1	1	1	0	1	0	1	0	1	1	9
Elaeis_872_0	0	0	0	0	0	0	0	0	0	0	0	0	0	0	0	0	0	0
Elaeis_872_1	1	1	1	1	1	1	1	1	1	1	1	1	1	1	1	1	1	17
Elaeis_872_3	1	1	1	1	1	1	1	1	1	1	1	1	1	1	1	1	1	17
Elaeis_872_4	1	1	1	1	1	1	1	1	1	1	1	1	1	1	1	1	1	17
Elaeis_872_6	1	1	1	0	1	1	1	1	1	1	1	1	1	1	1	1	1	16
Elaeis_872_7	1	1	0	1	0	1	0	1	1	1	1	1	1	1	1	1	1	14
Elaeis_874_0	1	0	1	0	0	1	0	0	0	0	1	1	0	0	0	1	0	6
Elaeis_874_1	1	0	1	1	0	1	0	0	0	0	1	1	0	0	0	1	0	7
Elaeis_874_11	1	1	0	1	0	0	0	0	1	0	1	0	0	0	0	0	0	5
Elaeis_874_9	1	0	1	1	0	0	0	0	0	1	1	1	0	1	0	0	1	8
Elaeis_883_0	0	1	1	1	1	0	1	0	1	1	1	1	1	1	1	1	1	14
Elaeis_883_1	1	1	1	1	1	0	1	1	1	1	1	1	1	1	1	1	1	16
Elaeis_883_10	1	1	0	0	0	0	1	0	1	1	1	1	1	1	1	1	1	12
Elaeis_883_12	0	0	1	0	1	1	1	1	1	0	1	1	1	1	1	1	1	13
Elaeis_883_2	1	1	1	1	1	1	1	1	1	1	1	1	1	0	1	1	1	16
Elaeis_883_3	1	1	1	1	1	1	1	1	0	1	1	1	1	1	1	1	1	16
Elaeis_883_4	1	1	1	1	1	1	1	1	1	1	1	1	1	1	1	1	1	17
Elaeis_883_6	1	1	1	0	1	1	1	1	1	1	1	1	1	1	1	0	1	15
Elaeis_88_0	1	1	1	1	1	1	1	1	1	0	1	0	0	1	1	1	1	14
Elaeis_88_1	1	1	1	1	1	1	1	1	1	1	1	0	1	1	1	1	1	16
Elaeis_88_10	1	1	1	1	1	1	1	1	1	1	1	0	1	1	1	1	1	16
Elaeis_88_14	0	0	0	0	0	0	0	0	0	0	0	0	0	0	0	0	0	0
Elaeis_88_5	1	1	0	0	1	1	1	1	1	1	1	1	1	1	1	1	1	15
Elaeis_88_6	1	0	1	0	1	1	1	1	1	1	1	0	1	1	1	1	1	14
Elaeis_897_0	1	1	1	1	0	1	1	1	1	1	1	1	1	1	1	1	1	16
Elaeis_897_10	0	0	0	0	0	0	0	0	0	0	0	0	0	0	0	0	0	0
Elaeis_897_11	0	0	0	0	0	0	0	0	0	0	0	0	0	0	0	0	0	0
Elaeis_897_12	1	1	1	1	0	0	1	1	1	1	1	1	1	0	1	1	1	14
Elaeis_897_13	1	1	1	0	1	1	1	1	1	1	1	1	1	0	1	1	1	15
Elaeis_897_7	1	1	1	1	1	1	1	1	0	1	1	0	1	1	1	1	1	15
Elaeis_897_8	0	0	0	0	0	0	0	0	0	0	0	0	0	0	0	0	0	0
Elaeis_89_1	1	1	1	1	1	1	1	1	0	1	1	1	1	1	1	1	1	16
Elaeis_89_2	1	1	1	1	1	1	1	1	0	1	1	1	1	1	1	1	1	16
Elaeis_89_3	1	1	1	1	1	1	1	1	1	1	1	1	1	1	1	1	1	17
Elaeis_89_5	0	1	0	1	1	1	0	0	1	1	1	1	1	0	0	1	0	10
Elaeis_938_0	0	0	0	0	0	0	0	0	0	0	0	0	0	0	0	0	0	0
Elaeis_938_1	1	1	1	1	1	1	1	0	0	0	1	1	1	1	1	1	1	14
Elaeis_938_3	1	1	1	1	1	1	1	1	1	1	1	1	1	1	1	1	1	17
Elaeis_948_0	0	0	0	0	0	0	1	0	0	1	0	0	0	0	1	0	0	3
Elaeis_948_1	0	0	0	0	0	0	1	0	1	0	0	0	0	0	0	0	0	2
Elaeis_948_2	1	0	1	1	1	1	1	1	0	1	1	1	1	1	0	1	1	14
Elaeis_948_3	1	1	1	1	0	1	1	1	1	1	1	1	1	1	0	1	1	15
Elaeis_94_1	1	1	1	1	1	1	1	1	1	1	1	1	1	1	1	1	1	17
Elaeis_94_2	1	1	1	1	1	1	1	1	1	1	1	1	1	1	1	1	1	17
Elaeis_94_6	0	0	0	0	0	0	1	0	0	0	1	0	0	0	0	0	0	2
Elaeis_958_1	1	1	1	1	1	1	1	1	1	1	0	1	1	1	1	0	1	15
Elaeis_958_11	1	1	1	1	1	1	1	1	0	1	1	1	1	1	1	1	1	16
Elaeis_958_12	0	1	0	0	0	0	0	0	0	0	0	0	0	0	0	0	0	1
Elaeis_958_5	1	1	1	1	1	1	1	1	1	1	1	1	1	1	1	1	1	17
Elaeis_958_6	1	1	1	1	1	1	1	1	1	1	1	1	1	1	1	1	1	17
Elaeis_958_7	1	1	1	0	1	1	1	1	1	1	1	1	1	1	1	1	1	16
Elaeis_958_8	1	1	1	1	1	1	1	1	1	1	1	1	0	1	1	1	1	16
Elaeis_958_9	1	0	1	1	1	1	1	1	0	1	1	1	1	1	1	1	1	15
Elaeis_964_0	0	1	0	0	1	0	0	0	0	0	1	0	0	0	1	1	0	5
Elaeis_964_14	1	1	1	0	1	1	1	1	1	1	1	1	1	1	1	1	1	16
Elaeis_964_15	1	1	0	1	1	1	1	1	1	0	1	1	0	1	0	1	1	13
Elaeis_964_5	1	1	1	0	0	1	1	1	1	1	0	1	1	1	1	1	1	14
Elaeis_964_6	1	1	1	1	1	1	1	1	1	1	1	1	1	1	1	1	1	17
Elaeis_964_8	1	1	1	1	1	1	1	1	1	1	1	1	1	1	1	1	1	17
Elaeis_985_1	1	1	1	1	1	1	1	1	1	1	1	1	1	1	1	1	1	17
Elaeis_985_2	1	0	1	1	1	1	1	1	0	1	1	1	1	1	1	0	1	14
Elaeis_985_3	1	1	1	1	1	1	1	1	1	1	1	1	1	1	1	1	1	17
Elaeis_985_4	1	1	1	1	1	1	1	1	1	1	1	1	1	1	0	1	1	16
Elaeis_985_5	1	0	1	1	1	1	1	1	1	1	1	0	1	0	1	1	1	14
Elaeis_985_6	1	1	0	0	1	1	1	1	1	1	1	1	1	1	1	1	1	15
Elaeis_985_7	1	1	1	1	1	1	1	1	1	1	1	1	1	1	1	1	1	17
Elaeis_985_8	1	1	1	0	1	1	1	1	1	1	1	1	1	1	0	1	1	15
Elaeis_985_9	0	0	0	1	1	0	1	0	1	1	1	0	1	1	1	1	1	11
Elaeis_989_0	1	1	1	1	0	1	1	1	1	1	1	1	1	1	1	1	1	16
Elaeis_989_2	1	1	1	1	1	1	1	1	1	1	1	1	1	1	1	1	1	17
Elaeis_989_3	1	1	1	1	1	1	1	1	1	1	1	1	1	1	1	1	1	17
Elaeis_989_5	1	1	0	0	0	0	0	0	0	0	0	0	0	0	0	1	0	3
Elaeis_989_6	1	1	0	1	1	1	1	0	0	1	1	1	0	1	1	1	1	13
Nypa_326_2	1	1	1	0	1	1	1	1	1	1	1	1	1	1	1	1	1	16
Nypa_326_3	1	1	1	0	1	1	1	1	1	1	1	1	1	0	1	1	1	15
Nypa_326_5	1	1	1	0	1	1	1	1	1	1	1	1	1	1	1	1	1	16
Nypa_326_6	1	1	1	1	1	1	1	0	1	1	1	1	1	1	1	1	1	16
Nypa_326_7	1	1	1	1	1	1	1	1	1	1	1	1	1	1	1	1	1	17
Nypa_883_1	1	1	1	1	1	1	1	1	1	1	1	1	1	1	1	1	1	17
Nypa_883_5	0	0	0	0	0	0	0	0	0	0	0	0	0	0	0	0	0	0
Phoenix_125_0	1	1	1	0	0	1	0	1	1	0	1	0	1	1	1	1	1	12
Phoenix_225_3	0	0	0	0	0	0	0	0	0	0	0	0	0	0	0	0	0	0
Phoenix_225_6	0	0	0	0	0	0	0	0	0	0	0	0	0	0	0	0	0	0
Phoenix_225_7	0	0	0	0	0	0	0	0	1	0	0	0	0	0	0	1	1	3
Phoenix_225_8	0	0	0	0	0	0	0	1	0	0	0	0	1	0	0	0	0	2
Phoenix_252_1	0	0	0	0	0	0	0	0	1	1	0	0	0	0	1	0	0	3
Phoenix_252_2	1	1	1	1	1	1	1	1	1	1	1	1	1	1	1	1	1	17
Phoenix_252_7	1	1	1	1	1	1	1	1	1	1	1	1	1	0	1	1	1	16
Sabal_110_0	1	1	1	1	1	1	1	1	1	1	1	1	1	1	1	1	1	17
Sabal_110_1	1	1	1	1	1	1	1	1	1	1	1	1	1	1	1	1	1	17
Sabal_110_10	1	1	1	1	1	0	1	1	1	1	1	1	1	1	1	1	0	15
Sabal_110_11	0	1	0	0	0	0	1	0	1	0	0	1	0	0	0	0	0	4
Sabal_110_5	1	1	1	1	1	1	1	1	0	0	0	1	1	1	0	1	1	13
Sabal_110_6	1	1	1	1	1	1	1	1	1	1	1	1	1	1	1	1	1	17
Sabal_110_7	1	1	1	1	1	1	0	1	1	1	1	1	1	1	1	1	1	16
Sabal_110_8	1	1	0	1	1	1	1	1	1	1	1	0	1	1	1	1	0	14
Sabal_110_9	1	1	1	0	1	1	1	1	1	1	1	1	1	0	1	1	1	15
Sabal_120_0	1	0	0	0	0	1	1	1	1	1	1	1	1	0	0	1	1	11
Sabal_120_3	1	1	1	1	1	1	1	1	1	1	1	1	1	1	1	1	1	17
Sabal_120_5	1	1	1	1	1	1	1	1	1	1	1	1	1	1	1	1	1	17
Sabal_148_0	0	0	0	0	0	0	0	0	1	0	0	1	0	0	0	1	1	4
Sabal_148_1	1	1	1	1	1	1	1	0	1	1	1	1	1	1	1	1	1	16
Sabal_148_2	0	0	1	1	0	1	0	0	0	0	1	1	1	0	0	1	0	7
Sabal_148_3	0	1	1	1	1	1	1	1	1	1	1	1	1	1	1	1	1	16
Sabal_148_4	1	1	1	1	1	1	1	1	1	1	1	1	1	1	1	1	1	17
Sabal_148_5	1	1	1	0	1	1	0	1	0	1	1	1	1	1	1	0	1	13
Sabal_168_2	1	1	1	1	1	0	1	1	1	1	1	1	1	1	1	1	1	16
Sabal_17_0	0	1	1	0	1	1	1	1	1	1	1	1	1	1	1	1	1	15
Sabal_17_1	1	1	1	1	1	1	1	1	1	1	1	1	0	1	1	1	1	16
Sabal_17_2	1	1	1	1	1	1	1	1	1	1	1	1	0	1	1	1	1	16
Sabal_17_3	1	1	1	1	1	1	1	1	1	1	1	1	1	1	1	1	1	17
Sabal_17_5	1	1	1	1	1	1	1	1	1	1	1	1	1	1	1	1	1	17
Sabal_180_1	0	0	1	0	0	0	0	0	0	0	0	0	0	0	0	1	0	2
Sabal_180_3	0	0	0	0	1	0	0	0	0	0	0	0	1	0	0	0	0	2
Sabal_204_0	1	0	0	0	0	1	0	0	1	1	1	1	1	1	1	1	1	11
Sabal_204_3	1	1	1	1	1	1	1	1	1	1	1	1	1	1	1	1	1	17
Sabal_204_5	0	0	1	1	1	1	1	1	1	1	0	1	1	0	1	1	1	13
Sabal_204_6	1	1	1	1	1	1	1	1	1	1	1	1	0	0	1	1	1	15
Sabal_215_0	0	0	0	1	1	0	1	0	0	0	0	1	1	0	0	1	1	7
Sabal_215_1	0	0	0	0	0	1	0	0	0	0	0	1	0	0	0	0	0	2
Sabal_215_5	1	1	0	1	0	0	0	0	0	0	0	0	0	1	0	1	0	5
Sabal_215_6	1	1	0	1	0	0	0	1	0	0	1	0	1	1	0	1	0	8
Sabal_240_0	1	1	1	1	1	1	0	1	1	1	1	1	1	1	1	0	1	15
Sabal_240_1	1	1	1	1	1	1	1	1	1	1	1	1	0	1	1	1	1	16
Sabal_245_0	1	1	1	1	1	1	1	1	1	1	1	1	1	1	0	1	1	16
Sabal_245_1	1	1	1	1	1	0	1	1	1	1	1	1	1	1	1	0	1	15
Sabal_245_10	1	1	1	1	1	1	1	1	1	1	1	1	1	1	1	1	1	17
Sabal_245_11	1	1	1	1	1	1	1	1	1	1	1	1	1	0	1	1	1	16
Sabal_245_4	0	0	0	0	0	0	0	0	0	0	0	0	0	0	0	0	0	0
Sabal_245_8	1	1	1	1	1	1	0	1	1	1	1	1	1	1	1	1	1	16
Sabal_252_0	0	1	0	1	1	1	1	0	0	0	1	0	0	0	0	0	0	6
Sabal_252_1	1	1	0	1	1	0	0	0	0	0	1	1	1	0	0	1	1	9
Sabal_252_3	1	1	1	1	0	0	0	1	1	1	1	0	0	1	1	1	0	11
Sabal_252_4	1	0	0	0	1	1	0	0	0	0	1	0	1	0	0	0	0	5
Sabal_252_5	1	0	0	0	1	1	0	0	0	0	0	0	1	0	0	0	0	4
Sabal_252_6	1	0	0	0	1	0	0	0	0	0	1	0	1	0	0	0	0	4
Sabal_252_7	0	0	0	1	0	0	0	0	0	0	0	0	0	0	0	0	0	1
Sabal_267_1	0	0	0	0	0	0	0	0	0	0	0	0	0	0	0	0	0	0
Sabal_267_10	1	1	1	0	1	1	1	1	1	1	1	1	1	1	0	1	1	15
Sabal_267_11	1	0	0	1	0	1	0	0	1	1	0	0	1	0	0	0	1	7
Sabal_267_12	1	1	1	1	0	1	1	1	1	1	1	1	1	1	1	1	1	16
Sabal_267_9	1	1	1	1	1	1	1	1	1	1	1	1	1	1	1	1	1	17
Sabal_296_0	0	0	0	0	0	0	0	0	0	0	0	1	0	0	0	0	1	2
Sabal_296_1	0	0	1	1	1	1	0	1	1	0	1	0	0	1	0	1	1	10
Sabal_296_11	1	1	1	1	1	1	1	1	1	1	1	1	1	1	1	1	1	17
Sabal_296_13	1	1	1	1	1	1	1	1	1	1	1	1	1	0	1	1	1	16
Sabal_296_2	1	0	1	1	1	1	0	1	1	0	0	0	0	1	0	1	1	10
Sabal_296_3	1	0	1	1	1	1	0	1	1	0	0	0	0	1	0	1	1	10
Sabal_296_4	1	0	1	1	1	1	0	0	1	1	0	0	0	1	0	1	1	10
Sabal_296_6	0	0	0	0	0	0	1	0	0	1	1	0	1	0	1	0	0	5
Sabal_296_8	1	1	1	1	1	1	1	1	1	1	0	1	1	1	1	1	1	16
Sabal_308_0	1	0	1	1	1	1	1	0	0	0	1	0	1	0	0	1	0	9
Sabal_308_2	1	1	1	1	1	1	1	1	1	1	1	1	1	1	1	1	1	17
Sabal_308_3	1	0	1	0	1	1	1	0	1	0	0	0	1	1	1	0	1	10
Sabal_32_2	1	1	1	1	1	1	1	1	1	1	1	1	0	1	1	1	1	16
Sabal_32_3	1	1	1	1	1	1	1	1	1	1	1	1	1	1	1	0	1	16
Sabal_32_4	1	1	1	0	1	1	1	1	1	1	1	1	0	0	1	1	1	14
Sabal_32_5	1	1	1	1	1	1	1	1	1	1	1	1	1	1	1	1	1	17
Sabal_32_6	1	1	0	1	1	1	1	0	1	1	1	1	1	1	1	1	1	15
Sabal_334_2	0	0	0	0	0	1	0	1	0	0	0	0	1	1	0	1	0	5
Sabal_334_3	0	0	0	0	0	0	0	0	0	1	0	0	0	0	0	0	0	1
Sabal_334_4	0	0	1	0	0	0	0	0	0	0	0	0	1	0	0	0	0	2
Sabal_360_0	1	1	1	1	1	1	1	0	1	1	1	1	1	1	1	1	1	16
Sabal_360_10	1	1	1	1	1	1	1	1	1	1	1	0	1	1	1	1	1	16
Sabal_378_0	1	1	1	1	1	1	0	1	1	1	0	1	1	1	1	1	1	15
Sabal_378_7	1	1	1	0	1	0	1	0	1	1	0	1	1	1	1	0	1	12
Sabal_417_0	0	0	0	0	0	0	0	0	0	0	0	0	0	0	0	0	0	0
Sabal_417_1	1	1	1	1	1	1	1	1	1	1	1	1	1	1	1	1	1	17
Sabal_417_2	1	1	1	1	1	1	1	1	1	1	1	1	1	1	1	1	1	17
Sabal_417_4	0	0	0	0	0	0	0	0	0	0	0	0	0	0	0	0	0	0
Sabal_417_5	0	0	0	0	0	0	0	0	0	0	0	0	0	0	0	0	0	0
Sabal_4_0	1	0	0	0	1	1	1	0	0	0	0	1	0	0	1	0	0	6
Sabal_4_1	1	1	1	1	1	1	1	1	1	1	1	1	1	1	1	1	1	17
Sabal_4_4	0	0	0	0	0	0	0	0	0	0	0	0	0	0	0	0	0	0
Sabal_4_6	1	1	1	1	0	1	1	1	1	1	1	1	1	1	0	0	1	14
Sabal_508_1	1	1	1	1	1	1	1	1	1	1	1	1	1	1	1	1	1	17
Sabal_508_2	1	1	1	1	1	1	1	0	1	1	1	1	1	1	1	1	1	16
Sabal_508_3	1	1	0	1	1	1	1	1	1	1	1	1	1	1	1	1	1	16
Sabal_508_5	1	0	1	1	1	1	1	1	0	1	1	1	1	1	1	1	1	15
Sabal_556_0	1	1	1	1	1	1	1	1	1	0	1	1	0	1	0	1	0	13
Sabal_556_7	0	1	0	0	0	0	0	1	0	1	0	0	1	1	1	0	0	6
Sabal_581_1	1	1	0	0	0	1	1	0	0	0	0	1	0	1	1	1	1	9
Sabal_581_10	1	1	1	0	1	1	1	1	1	1	1	1	1	1	1	1	1	16
Sabal_581_2	1	0	0	1	0	1	1	1	0	0	0	0	0	1	1	0	1	8
Sabal_581_3	0	0	0	0	0	0	1	0	0	0	0	1	0	0	0	0	1	3
Sabal_581_9	1	1	1	1	1	1	1	1	1	1	1	1	1	1	1	1	1	17
Sabal_587_1	1	1	1	1	1	1	1	1	0	0	1	1	1	1	0	1	1	14
Sabal_587_4	0	0	0	0	0	0	0	0	0	0	0	0	0	0	0	0	0	0
Sabal_61_3	1	1	1	1	1	1	1	1	1	1	1	1	1	1	1	1	1	17
Sabal_61_4	0	0	0	0	0	0	0	0	0	0	0	0	0	0	0	0	0	0
Sabal_703_0	1	1	0	0	0	1	0	1	1	0	0	0	0	1	0	1	0	7
Sabal_703_1	0	1	1	0	1	0	0	1	0	1	0	1	1	0	1	0	0	8
Sabal_703_5	1	1	1	1	1	1	1	1	1	1	1	1	1	1	1	1	1	17
Sabal_703_6	0	0	1	0	1	0	1	0	0	0	0	1	0	0	0	1	1	6
Sabal_703_7	0	0	1	1	0	1	0	0	0	0	1	1	0	0	0	1	0	6
Sabal_728_2	0	0	0	0	1	0	0	0	0	0	0	1	0	0	0	0	0	2
Sabal_728_4	1	1	1	1	1	1	1	1	1	1	1	1	0	1	1	1	1	16
Sabal_736_0	0	0	0	0	0	0	0	0	0	0	1	0	0	1	0	0	0	2
Sabal_736_1	1	1	1	0	0	1	1	0	1	0	1	1	0	1	1	1	1	12
Sabal_736_2	1	1	0	1	1	1	1	0	1	0	1	1	1	0	0	1	1	12
Sabal_736_5	0	1	0	0	0	0	0	1	0	0	1	0	0	0	1	0	0	4
Sabal_736_6	1	0	1	0	1	1	1	0	1	1	1	1	1	1	1	1	1	14
Sabal_736_7	0	0	0	0	0	0	0	0	0	0	0	0	0	0	0	1	0	1
Sabal_743_1	1	1	0	0	0	0	1	0	0	1	0	0	0	0	1	1	0	6
Sabal_743_3	1	1	1	0	0	1	1	1	1	1	1	1	1	1	0	1	1	14
Sabal_743_6	1	1	1	1	1	1	1	1	1	1	1	1	1	1	1	1	1	17
Sabal_762_0	0	0	0	0	0	0	0	0	0	0	0	0	0	0	0	0	0	0
Sabal_762_1	0	0	0	0	0	0	0	1	0	1	0	0	0	0	0	0	0	2
Sabal_762_2	0	0	0	0	0	0	0	1	0	1	0	0	0	0	0	0	0	2
Sabal_762_3	0	0	0	0	1	0	0	0	0	0	0	0	0	0	0	0	0	1
Sabal_762_4	0	0	0	0	0	0	0	0	0	0	0	0	0	0	0	0	0	0
Sabal_762_5	0	0	0	0	1	0	0	0	0	0	0	1	1	0	0	0	0	3
Sabal_763_0	0	0	0	0	0	0	0	0	0	0	0	0	0	0	0	0	0	0
Sabal_763_2	0	1	0	0	0	0	0	0	0	0	0	0	0	0	0	0	0	1
Sabal_763_6	0	1	1	1	1	0	0	0	0	1	0	0	0	0	1	1	0	7
Sabal_790_0	1	1	1	1	1	1	0	1	1	1	1	0	1	1	1	1	1	15
Sabal_790_1	1	1	1	1	0	1	1	1	1	1	1	1	1	1	1	0	1	15
Sabal_790_11	0	0	0	0	0	0	0	0	0	0	0	0	0	0	0	0	0	0
Sabal_790_12	1	1	1	1	1	1	1	1	1	1	1	1	1	1	1	1	1	17
Sabal_790_3	1	1	1	1	1	1	1	1	1	1	1	1	1	1	0	1	1	16
Sabal_790_4	1	1	1	1	1	1	1	1	1	1	1	1	1	1	1	1	1	17
Sabal_790_5	1	1	1	0	1	1	1	1	1	1	1	1	1	1	1	1	1	16
Sabal_790_6	1	1	1	0	1	1	1	1	1	1	1	1	1	1	0	1	1	15
Sabal_825_5	1	1	1	0	1	1	1	1	1	1	1	1	1	1	1	1	1	16
Sabal_825_6	1	1	1	1	1	1	1	1	1	1	1	1	1	1	1	1	1	17
Sabal_82_0	1	1	0	1	1	1	1	1	1	1	1	1	1	1	1	0	0	14
Sabal_82_2	1	1	1	1	1	1	1	1	1	1	1	1	1	0	1	1	1	16
Sabal_82_3	0	1	1	0	1	1	1	0	1	1	1	1	0	1	1	1	1	13
Sabal_856_1	0	0	0	0	0	0	0	0	0	0	0	0	0	0	0	0	0	0
Sabal_856_2	1	1	1	1	0	1	1	1	1	1	1	1	1	1	1	1	1	16
Sabal_856_4	1	1	1	1	1	1	1	0	1	1	1	1	1	1	1	1	1	16
Sabal_856_6	1	1	0	0	0	1	1	1	1	1	1	0	1	1	1	1	1	13
Sabal_856_7	0	1	0	0	0	0	0	0	0	0	0	0	0	0	0	0	0	1
Sabal_886_1	0	0	0	1	0	0	0	0	0	0	0	0	0	0	0	0	0	1
Sabal_886_4	0	0	0	0	0	0	0	0	1	0	0	0	0	0	0	0	0	1
Sabal_950_0	0	0	0	0	0	0	1	0	0	0	1	0	0	0	0	0	0	2
Sabal_950_1	1	0	1	1	0	1	1	1	1	0	1	1	1	1	1	1	1	14
Sabal_950_3	1	1	1	1	1	1	1	1	1	1	1	1	1	0	0	1	1	15
Sabal_950_7	1	1	1	1	0	1	0	1	0	0	1	0	1	1	0	1	1	11
Sabal_977_1	0	0	0	0	0	0	0	0	0	0	0	0	0	0	0	0	0	0
Sabal_977_3	0	0	0	1	0	0	1	0	0	0	0	0	1	0	0	0	0	3
Sabal_977_6	1	1	1	0	0	1	1	1	1	1	0	0	1	1	1	1	1	13
Sabal_982_0	1	1	1	0	1	1	1	1	1	1	1	0	1	1	1	1	1	15
Sabal_982_3	0	1	1	1	1	0	1	1	1	1	1	0	0	1	0	1	1	12
Sabal_982_4	0	0	1	1	1	0	1	1	1	1	1	1	1	1	1	1	1	14
Sabal_982_6	1	1	1	0	1	1	1	1	1	1	0	0	1	1	1	1	1	14
contigs per sample	556	545	516	469	544	562	531	543	534	539	544	529	531	525	512	550	563
